# Supplementary material for: Exogenous silicon induces aluminum tolerance in white clover (Trifolium repens) by reducing aluminum uptake and enhancing organic acid secretion
Source: PeerJ journal article supplement (doi:10.7717/peerj.17472), 2024-05-30
Supplement: data1.xlsx [file data1.xlsx]

## Sheet: Growth
shoot length			cm		root length			cm
C	Si	Al	Al+Si		C	Si	Al	Al+Si
8.5	10.1	4	5		11.5	13.5	4	5.2
9.3	10.3	3.1	4.7		11.6	16	4	6
7.2	11	4.5	4.3		15.9	11.7	5	5.4
8.1	8.5	3	4.6		9.7	16.5	4	5.9
7.5	10.7	4	5		14.5	15	4.5	6
7.5	12	2.8	4.5		12	12.5	4	6.3
12	12	3.5	4.5		11	15.5	4.3	6.3
11	9.5	2.5	4.8		14.5	13	3.3	6.2
9.6	10.5	3.7	4.7		13.7	17.5	4	6.5
9.4	10.2	3.1	4.8		15	15	4.1	6.5
shoot DW					root DW
168.1	187.7	68.6	104.5		45.5	52.1	26	31.4
140.5	183.1	77.12	106.4		37.5	57.3	24.1	30
164	177	71.55	105.2		47.35	55.3	26.4	30.7
