# Supplementary material for: Exogenous silicon induces aluminum tolerance in white clover (Trifolium repens) by reducing aluminum uptake and enhancing organic acid secretion
Source: PeerJ journal article supplement (doi:10.7717/peerj.17472), 2024-05-30
Supplement: data2.xlsx [file data2.xlsx]

## Sheet: Physiological parameters
C	Si	Al	Al+Si		C	Si	Al	Al+Si
RWC					Chl
85.1119	85.5713	64.6672	78.0583		53.6999	40.7142	24.1267	37.3089
87.194	88.1809	62.8162	71.3307		56.3333	50.7679	24.9102	46.0603
84.4203	85.9733	62.5954	74.0525		52.9534	51.9704	26.0887	26.9705
84.9153	87.1875	64.6672	68.3105		47.69	55.2601	27.1923	32.6195
Fv/Fm					PI
0.81	0.83	0.63	0.74		4.11	3.66	0.33	1.54
0.81	0.82	0.66	0.72		3.89	3.35	0.55	1.32
0.8	0.82	0.73	0.64		3.67	4.64	0.32	1.04
0.8	0.82	0.53	0.66		3.17	3.94	0.26	0.93
0.83	0.82	0.57	0.63		3.38	3.25	0.26	0.72
0.82	0.81	0.57	0.8		3.41	4.58	0.28	1.72
0.83	0.83	0.73	0.78		3.8	3.65	0.3	1.9
0.82	0.82	0.55			2.41	3.9	0.4
EL	shoot				EL	root
22.5519	20.1138	51.8779	36.8159		29.0534	30.4762	68.323	47.954
25.5885	21.25	53.9085	36.9253		27.6018	32.6139	69.9461	48.4581
23.964	20.6457	50.2532	37.4625		30.5911	31.4982	67.4603	49.1453
25.1381	28.8192	51.6778	36.4113
MDA	shoot				MDA	root
25.8065	29.465	87.6264	51.9276		29.4904	36.5441	199.897	145.923
27.6761	26.8817	75.5311	46.7551		22.9008	23.8159	184.272	144.834
25.5916	23.986	103.277	50.5247		30.0658	24.262	212.582	131.86
29.8423	30.3569	98.5751	56.364		25.3059	31.6105	206.458	139.23
