# Supplementary material for: Exogenous silicon induces aluminum tolerance in white clover (Trifolium repens) by reducing aluminum uptake and enhancing organic acid secretion
Source: PeerJ journal article supplement (doi:10.7717/peerj.17472), 2024-05-30
Supplement: data3.xlsx [file data3.xlsx]

## Sheet: Si Al
C	Si	Al	Al+Si
shoot Al
0.08987	0.09003	6.99353	4.36395
0.08543	0.08621	8.30028	4.87198
0.08754	0.08239	6.45036	4.57935
0.09514	0.08213	6.74842	4.79916
root Al
0.3332	0.05443	25.3968	8.69473
0.57412	0.25728	24.6898	8.85821
0.74826	0.43219	24.5574	8.77932
0.42516	0.67728	25.1377	8.68676
shoot Si
0.19416	0.47314	0.18895	0.41265
0.18297	0.45536	0.17243	0.44357
0.16328	0.48924	0.17336	0.41274
0.17745	0.45325	0.1812	0.46635
root Si
0.22489	1.23634	0.18247	0.91256
0.25763	1.06827	0.18364	0.97431
0.24876	1.15941	0.16658	0.99846
0.25732	0.99776	0.17342	0.95768
