# Supplementary material for: Exogenous silicon induces aluminum tolerance in white clover (Trifolium repens) by reducing aluminum uptake and enhancing organic acid secretion
Source: PeerJ journal article supplement (doi:10.7717/peerj.17472), 2024-05-30
Supplement: data4.xlsx [file data4.xlsx]

## Sheet: OAs
C	Si	Al	Al+Si
CC
24.078	22.441	28.122	41.534
20.364	23.045	32.722	38.927
22.594	22.539	28.683	38.532
21.532	24.5	29.969	38.006
MC
53.7542	56.9736	61.8759	116.198
40.3226	64.63	65.2105	138.716
45.0491	51.2605	65.4719	136.208
47.1635	48.3265	70.9518	115.324
CE
0.0245	0.0177	0.2296	0.2507
0.0157	0.0241	0.2447	0.2471
0.0149	0.0324	0.2284	0.2654
0.0183667	0.0247333	0.234233	0.2544
ME
0.118371	0.153883	0.366951	0.733902
0.118371	0.16572	0.378788	0.544508
0.153883	0.130208	0.307765	0.627367
0.153883	0.130208	0.402462	0.591856
