# Supplementary material for: Exogenous silicon induces aluminum tolerance in white clover (Trifolium repens) by reducing aluminum uptake and enhancing organic acid secretion
Source: PeerJ journal article supplement (doi:10.7717/peerj.17472), 2024-05-30
Supplement: data5.xlsx [file data5.xlsx]

## Sheet: Element1
Spectrum	Al3+	Si	Cl-	K+	Mg2+	Zn2+
Relative weight (%)	0.05	0.02	2.07667	20.1267	1.86333	1.12667
Spectrum	Al3+	Si	Cl-	K+	Mg2+	Zn2+
Relative weight (%)	0.24	2.30667	4.11	25.7	2.02333	1.22667
Spectrum	Al3+	Si	Cl-	K+	Mg2+	Zn2+
Relative weight (%)	3.7	0.04	3.78333	11.86	0.71	0.0533333
Spectrum	Al3+	Si	Cl-	K+	Mg2+	Zn2+
Relative weight (%)	2.05667	1.78667	2.91	18.1267	1.39	0.243333

## Sheet: Element2
CK			SI			AL			AL+SI
0	0		0	0		0	0		0	0
0.005	0		0.005	0		0.005	0		0.005	0
0.01	0		0.01	0		0.01	0		0.01	0
0.015	0		0.015	0		0.015	0		0.015	0
0.02	0		0.02	0		0.02	0		0.02	0
0.025	0		0.025	0		0.025	0		0.025	0
0.03	0		0.03	0		0.03	0		0.03	0
0.035	0		0.035	0		0.035	0		0.035	0
0.04	0		0.04	0		0.04	0		0.04	0
0.045	0		0.045	0		0.045	0		0.045	0
0.05	0		0.05	0		0.05	0		0.05	0
0.055	0		0.055	0		0.055	0		0.055	0
0.06	0		0.06	0		0.06	0		0.06	0
0.065	0		0.065	0		0.065	0		0.065	0
0.07	0		0.07	0		0.07	0		0.07	0
0.075	0		0.075	0		0.075	0		0.075	0
0.08	0		0.08	0		0.08	0		0.08	0
0.085	0		0.085	2		0.085	1		0.085	0
0.09	1		0.09	0		0.09	1		0.09	2
0.095	2		0.095	2		0.095	5		0.095	3
0.1	1		0.1	5		0.1	5		0.1	7
0.105	4		0.105	5		0.105	7		0.105	8
0.11	7		0.11	6		0.11	16		0.11	16
0.115	19		0.115	20		0.115	27		0.115	21
0.12	15		0.12	19		0.12	33		0.12	51
0.125	29		0.125	24		0.125	42		0.125	40
0.13	23		0.13	25		0.13	45		0.13	41
0.135	34		0.135	21		0.135	54		0.135	46
0.14	28		0.14	36		0.14	46		0.14	55
0.145	30		0.145	26		0.145	47		0.145	51
0.15	43		0.15	34		0.15	53		0.15	68
0.155	49		0.155	37		0.155	58		0.155	60
0.16	50		0.16	35		0.16	66		0.16	55
0.165	36		0.165	36		0.165	70		0.165	56
0.17	40		0.17	37		0.17	69		0.17	57
0.175	46		0.175	36		0.175	64		0.175	54
0.18	35		0.18	38		0.18	74		0.18	55
0.185	54		0.185	53		0.185	80		0.185	66
0.19	46		0.19	41		0.19	68		0.19	59
0.195	70		0.195	53		0.195	100		0.195	80
0.2	74		0.2	72		0.2	97		0.2	73
0.205	76		0.205	82		0.205	136		0.205	99
0.21	123		0.21	96		0.21	183		0.21	143
0.215	169		0.215	159		0.215	290		0.215	146
0.22	213		0.22	210		0.22	389		0.22	220
0.225	328		0.225	326		0.225	514		0.225	326
0.23	477		0.23	453		0.23	816		0.23	452
0.235	627		0.235	637		0.235	1064		0.235	582
0.24	913		0.24	843		0.24	1482		0.24	833
0.245	1166		0.245	1103		0.245	2002		0.245	1059
0.25	1502		0.25	1428		0.25	2566		0.25	1345
0.255	1812		0.255	1702		0.255	3155		0.255	1566
0.26	2069		0.26	1829		0.26	3378		0.26	1777
0.265	2272		0.265	1952		0.265	3589		0.265	1937
0.27	2242		0.27	2100		0.27	3756		0.27	1936
0.275	2072		0.275	1965		0.275	3565		0.275	1764
0.28	1937		0.28	1774		0.28	3179		0.28	1621
0.285	1532		0.285	1505		0.285	2718		0.285	1338
0.29	1234		0.29	1195		0.29	2072		0.29	1054
0.295	946		0.295	850		0.295	1552		0.295	820
0.3	651		0.3	625		0.3	1121		0.3	550
0.305	431		0.305	420		0.305	689		0.305	400
0.31	271		0.31	261		0.31	419		0.31	268
0.315	178		0.315	150		0.315	299		0.315	154
0.32	119		0.32	115		0.32	196		0.32	112
0.325	75		0.325	62		0.325	117		0.325	87
0.33	53		0.33	49		0.33	78		0.33	59
0.335	65		0.335	50		0.335	88		0.335	69
0.34	64		0.34	44		0.34	79		0.34	64
0.345	85		0.345	53		0.345	89		0.345	86
0.35	81		0.35	67		0.35	127		0.35	79
0.355	111		0.355	77		0.355	151		0.355	133
0.36	148		0.36	120		0.36	177		0.36	144
0.365	163		0.365	137		0.365	176		0.365	181
0.37	203		0.37	120		0.37	262		0.37	223
0.375	206		0.375	163		0.375	295		0.375	205
0.38	239		0.38	169		0.38	326		0.38	218
0.385	227		0.385	160		0.385	301		0.385	273
0.39	242		0.39	178		0.39	300		0.39	286
0.395	204		0.395	147		0.395	281		0.395	207
0.4	200		0.4	160		0.4	271		0.4	181
0.405	163		0.405	114		0.405	212		0.405	155
0.41	134		0.41	103		0.41	193		0.41	137
0.415	96		0.415	90		0.415	146		0.415	123
0.42	89		0.42	63		0.42	146		0.42	96
0.425	79		0.425	63		0.425	89		0.425	83
0.43	65		0.43	45		0.43	82		0.43	77
0.435	54		0.435	52		0.435	79		0.435	67
0.44	58		0.44	53		0.44	73		0.44	79
0.445	79		0.445	67		0.445	88		0.445	81
0.45	91		0.45	70		0.45	94		0.45	82
0.455	87		0.455	88		0.455	125		0.455	125
0.46	138		0.46	103		0.46	155		0.46	150
0.465	150		0.465	156		0.465	216		0.465	167
0.47	244		0.47	202		0.47	269		0.47	244
0.475	353		0.475	317		0.475	419		0.475	349
0.48	479		0.48	376		0.48	534		0.48	522
0.485	693		0.485	557		0.485	714		0.485	654
0.49	860		0.49	720		0.49	976		0.49	807
0.495	1053		0.495	855		0.495	1211		0.495	1057
0.5	1337		0.5	1088		0.5	1549		0.5	1247
0.505	1553		0.505	1275		0.505	1767		0.505	1517
0.51	1645		0.51	1471		0.51	2007		0.51	1584
0.515	1851		0.515	1597		0.515	2174		0.515	1818
0.52	1880		0.52	1603		0.52	2328		0.52	1862
0.525	1787		0.525	1493		0.525	2148		0.525	1761
0.53	1726		0.53	1436		0.53	1994		0.53	1630
0.535	1513		0.535	1203		0.535	1750		0.535	1480
0.54	1281		0.54	1108		0.54	1519		0.54	1184
0.545	1048		0.545	803		0.545	1255		0.545	900
0.55	748		0.55	610		0.55	894		0.55	734
0.555	553		0.555	439		0.555	664		0.555	557
0.56	398		0.56	345		0.56	463		0.56	396
0.565	232		0.565	236		0.565	314		0.565	246
0.57	177		0.57	139		0.57	177		0.57	179
0.575	106		0.575	108		0.575	122		0.575	123
0.58	80		0.58	66		0.58	79		0.58	95
0.585	42		0.585	46		0.585	82		0.585	56
0.59	46		0.59	33		0.59	54		0.59	51
0.595	34		0.595	27		0.595	44		0.595	49
0.6	36		0.6	33		0.6	36		0.6	40
0.605	29		0.605	22		0.605	42		0.605	49
0.61	23		0.61	27		0.61	40		0.61	26
0.615	33		0.615	21		0.615	32		0.615	39
0.62	39		0.62	19		0.62	29		0.62	37
0.625	31		0.625	21		0.625	40		0.625	27
0.63	30		0.63	22		0.63	40		0.63	46
0.635	30		0.635	16		0.635	19		0.635	33
0.64	36		0.64	28		0.64	35		0.64	42
0.645	25		0.645	22		0.645	30		0.645	39
0.65	30		0.65	27		0.65	28		0.65	40
0.655	30		0.655	32		0.655	36		0.655	45
0.66	37		0.66	22		0.66	34		0.66	35
0.665	36		0.665	30		0.665	25		0.665	33
0.67	33		0.67	24		0.67	42		0.67	31
0.675	35		0.675	23		0.675	38		0.675	45
0.68	32		0.68	21		0.68	35		0.68	42
0.685	40		0.685	28		0.685	38		0.685	46
0.69	44		0.69	26		0.69	39		0.69	46
0.695	48		0.695	23		0.695	34		0.695	46
0.7	46		0.7	20		0.7	37		0.7	39
0.705	57		0.705	19		0.705	45		0.705	37
0.71	39		0.71	33		0.71	43		0.71	41
0.715	46		0.715	18		0.715	39		0.715	47
0.72	45		0.72	26		0.72	33		0.72	48
0.725	37		0.725	28		0.725	46		0.725	50
0.73	46		0.73	42		0.73	43		0.73	51
0.735	41		0.735	23		0.735	42		0.735	37
0.74	34		0.74	24		0.74	39		0.74	44
0.745	37		0.745	28		0.745	40		0.745	39
0.75	43		0.75	38		0.75	41		0.75	45
0.755	39		0.755	34		0.755	43		0.755	44
0.76	25		0.76	33		0.76	34		0.76	37
0.765	44		0.765	37		0.765	48		0.765	42
0.77	34		0.77	34		0.77	49		0.77	47
0.775	34		0.775	34		0.775	37		0.775	48
0.78	29		0.78	32		0.78	55		0.78	48
0.785	38		0.785	28		0.785	48		0.785	46
0.79	34		0.79	32		0.79	50		0.79	43
0.795	48		0.795	35		0.795	55		0.795	48
0.8	42		0.8	26		0.8	39		0.8	59
0.805	38		0.805	28		0.805	61		0.805	50
0.81	48		0.81	25		0.81	52		0.81	39
0.815	31		0.815	29		0.815	54		0.815	39
0.82	30		0.82	42		0.82	46		0.82	56
0.825	39		0.825	28		0.825	46		0.825	50
0.83	40		0.83	42		0.83	53		0.83	58
0.835	46		0.835	36		0.835	49		0.835	54
0.84	41		0.84	34		0.84	58		0.84	52
0.845	43		0.845	34		0.845	46		0.845	52
0.85	42		0.85	42		0.85	46		0.85	43
0.855	39		0.855	33		0.855	50		0.855	52
0.86	37		0.86	41		0.86	46		0.86	55
0.865	40		0.865	53		0.865	54		0.865	57
0.87	52		0.87	29		0.87	38		0.87	57
0.875	39		0.875	34		0.875	44		0.875	50
0.88	57		0.88	45		0.88	63		0.88	59
0.885	50		0.885	37		0.885	53		0.885	46
0.89	40		0.89	41		0.89	69		0.89	43
0.895	54		0.895	33		0.895	60		0.895	55
0.9	54		0.9	53		0.9	64		0.9	52
0.905	55		0.905	50		0.905	58		0.905	43
0.91	41		0.91	41		0.91	51		0.91	52
0.915	44		0.915	37		0.915	55		0.915	47
0.92	46		0.92	52		0.92	56		0.92	43
0.925	35		0.925	44		0.925	59		0.925	54
0.93	44		0.93	40		0.93	56		0.93	54
0.935	44		0.935	42		0.935	53		0.935	52
0.94	38		0.94	26		0.94	57		0.94	58
0.945	48		0.945	41		0.945	41		0.945	54
0.95	41		0.95	45		0.95	52		0.95	57
0.955	53		0.955	47		0.955	57		0.955	48
0.96	48		0.96	48		0.96	60		0.96	48
0.965	70		0.965	49		0.965	48		0.965	53
0.97	56		0.97	56		0.97	48		0.97	60
0.975	54		0.975	54		0.975	62		0.975	52
0.98	69		0.98	57		0.98	44		0.98	64
0.985	66		0.985	60		0.985	53		0.985	53
0.99	65		0.99	63		0.99	48		0.99	66
0.995	103		0.995	72		0.995	46		0.995	74
1	88		1	82		1	57		1	76
1.005	95		1.005	93		1.005	54		1.005	68
1.01	106		1.01	103		1.01	67		1.01	68
1.015	144		1.015	118		1.015	60		1.015	65
1.02	128		1.02	119		1.02	63		1.02	73
1.025	165		1.025	142		1.025	65		1.025	92
1.03	143		1.03	136		1.03	60		1.03	82
1.035	143	ZN	1.035	132		1.035	59		1.035	87
1.04	158		1.04	133		1.04	68		1.04	90
1.045	155		1.045	131		1.045	53		1.045	76
1.05	146		1.05	125		1.05	74		1.05	74
1.055	154		1.055	120		1.055	53		1.055	75
1.06	117		1.06	117		1.06	58		1.06	82
1.065	118		1.065	110		1.065	63		1.065	64
1.07	119		1.07	101		1.07	54		1.07	69
1.075	109		1.075	89		1.075	62		1.075	66
1.08	92		1.08	82		1.08	51		1.08	66
1.085	91		1.085	78		1.085	60		1.085	62
1.09	70		1.09	60		1.09	63		1.09	61
1.095	68		1.095	56		1.095	59		1.095	58
1.1	65		1.1	61		1.1	57		1.1	69
1.105	61		1.105	64		1.105	57		1.105	76
1.11	46		1.11	59		1.11	57		1.11	58
1.115	57		1.115	49		1.115	58		1.115	50
1.12	54		1.12	53		1.12	59		1.12	64
1.125	52		1.125	61		1.125	66		1.125	63
1.13	49		1.13	43		1.13	70		1.13	64
1.135	62		1.135	45		1.135	79		1.135	53
1.14	78		1.14	40		1.14	63		1.14	60
1.145	63		1.145	53		1.145	59		1.145	61
1.15	57		1.15	57		1.15	55		1.15	72
1.155	66		1.155	69		1.155	63		1.155	43
1.16	67		1.16	61		1.16	65		1.16	76
1.165	61		1.165	68		1.165	66		1.165	76
1.17	72		1.17	68		1.17	63		1.17	79
1.175	63		1.175	68		1.175	55		1.175	76
1.18	68		1.18	61		1.18	52		1.18	77
1.185	67		1.185	57		1.185	49		1.185	63
1.19	68		1.19	70		1.19	50		1.19	71
1.195	72		1.195	62		1.195	52		1.195	76
1.2	89		1.2	64		1.2	58		1.2	69
1.205	91		1.205	62		1.205	79		1.205	84
1.21	77		1.21	76		1.21	63		1.21	82
1.215	110		1.215	105		1.215	66		1.215	98
1.22	121		1.22	107		1.22	65		1.22	75
1.225	133		1.225	118		1.225	67		1.225	91
1.23	130		1.23	120		1.23	85		1.23	73
1.235	124		1.235	123		1.235	94		1.235	117
1.24	180		1.24	180		1.24	90		1.24	100
1.245	179		1.245	188		1.245	84		1.245	113
1.25	192	MG	1.25	189		1.25	82		1.25	94
1.255	159		1.255	160		1.255	68		1.255	102
1.26	160		1.26	162		1.26	81		1.26	128
1.265	165		1.265	162		1.265	78		1.265	117
1.27	151		1.27	159		1.27	85		1.27	87
1.275	179		1.275	153		1.275	74		1.275	92
1.28	130		1.28	140		1.28	69		1.28	94
1.285	125		1.285	120		1.285	75		1.285	97
1.29	121		1.29	120		1.29	65		1.29	75
1.295	109		1.295	100		1.295	60		1.295	88
1.3	102		1.3	97		1.3	68		1.3	59
1.305	94		1.305	93		1.305	56		1.305	69
1.31	77		1.31	89		1.31	76		1.31	75
1.315	95		1.315	82		1.315	58		1.315	65
1.32	80		1.32	70		1.32	78		1.32	64
1.325	87		1.325	70		1.325	76		1.325	66
1.33	79		1.33	68		1.33	67		1.33	65
1.335	57		1.335	65		1.335	60		1.335	56
1.34	71		1.34	52		1.34	62		1.34	61
1.345	79		1.345	51		1.345	67		1.345	58
1.35	69		1.35	65		1.35	62		1.35	61
1.355	65		1.355	52		1.355	69		1.355	65
1.36	75		1.36	59		1.36	72		1.36	60
1.365	78		1.365	60		1.365	72		1.365	56
1.37	68		1.37	59		1.37	75		1.37	70
1.375	57		1.375	46		1.375	67		1.375	63
1.38	64		1.38	69		1.38	63		1.38	77
1.385	65		1.385	68		1.385	59		1.385	54
1.39	72		1.39	61		1.39	73		1.39	74
1.395	78		1.395	62		1.395	84		1.395	63
1.4	79		1.4	51		1.4	73		1.4	71
1.405	88		1.405	78		1.405	85		1.405	71
1.41	80		1.41	82		1.41	83		1.41	66
1.415	80		1.415	66		1.415	73		1.415	69
1.42	97		1.42	69		1.42	83		1.42	96
1.425	98		1.425	62		1.425	75		1.425	86
1.43	98		1.43	83		1.43	87		1.43	89
1.435	99		1.435	79		1.435	230		1.435	74
1.44	100		1.44	86		1.44	233		1.44	96
1.445	92		1.445	80		1.445	214		1.445	121
1.45	94		1.45	80		1.45	244		1.45	136
1.455	97		1.455	94		1.455	257		1.455	119
1.46	95		1.46	86		1.46	276		1.46	152
1.465	92		1.465	80		1.465	316		1.465	160
1.47	106		1.47	81		1.47	326		1.47	158
1.475	105		1.475	82		1.475	380		1.475	160
1.48	111		1.48	82		1.48	419		1.48	170
1.485	114	AL	1.485	74		1.485	442		1.485	172
1.49	106		1.49	81		1.49	448		1.49	182
1.495	108		1.495	82		1.495	431		1.495	212
1.5	104		1.5	93		1.5	388		1.5	164
1.505	97		1.505	82		1.505	313		1.505	175
1.51	97		1.51	77		1.51	263		1.51	158
1.515	99		1.515	88		1.515	251		1.515	135
1.52	94		1.52	93		1.52	222		1.52	137
1.525	93		1.525	95		1.525	191		1.525	139
1.53	92		1.53	78		1.53	160		1.53	115
1.535	94		1.535	96		1.535	157		1.535	104
1.54	88		1.54	81		1.54	133		1.54	98
1.545	84		1.545	87		1.545	107		1.545	105
1.55	85		1.55	88		1.55	115		1.55	81
1.555	78		1.555	79		1.555	117		1.555	79
1.56	80		1.56	84		1.56	102		1.56	82
1.565	85		1.565	86		1.565	103		1.565	87
1.57	74		1.57	68		1.57	74		1.57	87
1.575	74		1.575	82		1.575	88		1.575	86
1.58	75		1.58	85		1.58	74		1.58	79
1.585	77		1.585	82		1.585	85		1.585	85
1.59	82		1.59	74		1.59	99		1.59	73
1.595	76		1.595	88		1.595	69		1.595	74
1.6	85		1.6	83		1.6	67		1.6	69
1.605	91		1.605	68		1.605	73		1.605	65
1.61	94		1.61	67		1.61	81		1.61	76
1.615	91		1.615	71		1.615	83		1.615	58
1.62	80		1.62	50		1.62	74		1.62	67
1.625	72		1.625	71		1.625	82		1.625	60
1.63	69		1.63	71		1.63	69		1.63	62
1.635	57		1.635	66		1.635	63		1.635	66
1.64	76		1.64	63		1.64	79		1.64	67
1.645	67		1.645	65		1.645	77		1.645	45
1.65	75		1.65	73		1.65	69		1.65	64
1.655	61		1.655	76		1.655	67		1.655	56
1.66	58		1.66	71		1.66	72		1.66	54
1.665	62		1.665	74		1.665	69		1.665	71
1.67	60		1.67	83		1.67	74		1.67	62
1.675	68		1.675	75		1.675	67		1.675	76
1.68	57		1.68	95		1.68	63		1.68	55
1.685	57		1.685	107		1.685	63		1.685	90
1.69	69		1.69	120		1.69	87		1.69	98
1.695	66		1.695	137		1.695	71		1.695	101
1.7	65		1.7	142		1.7	72		1.7	101
1.705	69		1.705	155		1.705	77		1.705	104
1.71	76		1.71	163		1.71	72		1.71	106
1.715	75		1.715	179		1.715	65		1.715	109
1.72	75		1.72	189		1.72	70		1.72	118
1.725	90		1.725	203		1.725	72		1.725	124
1.73	79		1.73	217		1.73	69		1.73	124
1.735	89		1.735	220		1.735	83		1.735	130
1.74	60	SI	1.74	230		1.74	77		1.74	135
1.745	59		1.745	227		1.745	72		1.745	135
1.75	78		1.75	224		1.75	73		1.75	127
1.755	86		1.755	210		1.755	64		1.755	111
1.76	81		1.76	200		1.76	82		1.76	100
1.765	74		1.765	195		1.765	65		1.765	98
1.77	60		1.77	174		1.77	62		1.77	94
1.775	69		1.775	160		1.775	67		1.775	88
1.78	66		1.78	171		1.78	69		1.78	81
1.785	66		1.785	155		1.785	74		1.785	62
1.79	72		1.79	148		1.79	60		1.79	68
1.795	76		1.795	132		1.795	66		1.795	80
1.8	72		1.8	124		1.8	65		1.8	70
1.805	77		1.805	119		1.805	68		1.805	51
1.81	50		1.81	108		1.81	67		1.81	46
1.815	67		1.815	85		1.815	59		1.815	67
1.82	62		1.82	77		1.82	65		1.82	63
1.825	54		1.825	76		1.825	53		1.825	78
1.83	56		1.83	79		1.83	74		1.83	65
1.835	61		1.835	82		1.835	74		1.835	91
1.84	82		1.84	84		1.84	69		1.84	64
1.845	57		1.845	68		1.845	68		1.845	68
1.85	68		1.85	63		1.85	70		1.85	50
1.855	69		1.855	67		1.855	60		1.855	65
1.86	68		1.86	53		1.86	73		1.86	72
1.865	54		1.865	65		1.865	45		1.865	54
1.87	64		1.87	51		1.87	61		1.87	54
1.875	54		1.875	60		1.875	62		1.875	57
1.88	61		1.88	64		1.88	60		1.88	60
1.885	51		1.885	59		1.885	59		1.885	47
1.89	65		1.89	73		1.89	73		1.89	61
1.895	67		1.895	56		1.895	63		1.895	59
1.9	68		1.9	75		1.9	62		1.9	62
1.905	90		1.905	64		1.905	45		1.905	65
1.91	83		1.91	62		1.91	57		1.91	74
1.915	81		1.915	53		1.915	79		1.915	62
1.92	98		1.92	76		1.92	47		1.92	75
1.925	104		1.925	86		1.925	67		1.925	78
1.93	116		1.93	93		1.93	72		1.93	88
1.935	114		1.935	106		1.935	79		1.935	91
1.94	135		1.94	115		1.94	72		1.94	118
1.945	171		1.945	161		1.945	106		1.945	121
1.95	188		1.95	178		1.95	107		1.95	147
1.955	216		1.955	196		1.955	104		1.955	155
1.96	258		1.96	243		1.96	111		1.96	209
1.965	331		1.965	320		1.965	135		1.965	229
1.97	320		1.97	321		1.97	141		1.97	269
1.975	412		1.975	410		1.975	168		1.975	291
1.98	489		1.98	477		1.98	204		1.98	375
1.985	566		1.985	564		1.985	247		1.985	363
1.99	551		1.99	561		1.99	241		1.99	481
1.995	663		1.995	669		1.995	264		1.995	468
2	691		2	687		2	300		2	475
2.005	738		2.005	726		2.005	271		2.005	516
2.01	756		2.01	753		2.01	362		2.01	536
2.015	763		2.015	759		2.015	312		2.015	580
2.02	790	P	2.02	800		2.02	311		2.02	538
2.025	779		2.025	798		2.025	321		2.025	546
2.03	750		2.03	749		2.03	301		2.03	554
2.035	674		2.035	680		2.035	325		2.035	483
2.04	650		2.04	654		2.04	305		2.04	406
2.045	550		2.045	564		2.045	231		2.045	421
2.05	524		2.05	532		2.05	251		2.05	386
2.055	431		2.055	421		2.055	233		2.055	327
2.06	369		2.06	366		2.06	202		2.06	316
2.065	357		2.065	342		2.065	200		2.065	260
2.07	288		2.07	299		2.07	165		2.07	226
2.075	255		2.075	274		2.075	137		2.075	192
2.08	209		2.08	210		2.08	140		2.08	171
2.085	201		2.085	206		2.085	141		2.085	180
2.09	168		2.09	170		2.09	132		2.09	158
2.095	169		2.095	169		2.095	110		2.095	125
2.1	159		2.1	147		2.1	108		2.1	127
2.105	119		2.105	129		2.105	103		2.105	124
2.11	131		2.11	120		2.11	90		2.11	131
2.115	130		2.115	111		2.115	115		2.115	113
2.12	107		2.12	104		2.12	105		2.12	109
2.125	134		2.125	99		2.125	114		2.125	106
2.13	124		2.13	113		2.13	99		2.13	96
2.135	145		2.135	95		2.135	98		2.135	109
2.14	133		2.14	82		2.14	87		2.14	105
2.145	119		2.145	86		2.145	117		2.145	97
2.15	109		2.15	87		2.15	99		2.15	104
2.155	102		2.155	78		2.155	79		2.155	102
2.16	99		2.16	89		2.16	67		2.16	113
2.165	100		2.165	71		2.165	60		2.165	98
2.17	96		2.17	78		2.17	68		2.17	82
2.175	67		2.175	70		2.175	76		2.175	61
2.18	81		2.18	63		2.18	64		2.18	66
2.185	71		2.185	60		2.185	55		2.185	62
2.19	65		2.19	50		2.19	57		2.19	74
2.195	72		2.195	73		2.195	56		2.195	70
2.2	74		2.2	68		2.2	51		2.2	79
2.205	55		2.205	60		2.205	62		2.205	50
2.21	77		2.21	71		2.21	46		2.21	59
2.215	55		2.215	65		2.215	52		2.215	81
2.22	64		2.22	69		2.22	68		2.22	74
2.225	73		2.225	73		2.225	66		2.225	78
2.23	72		2.23	77		2.23	55		2.23	93
2.235	88		2.235	80		2.235	62		2.235	75
2.24	95		2.24	99		2.24	92		2.24	117
2.245	88		2.245	102		2.245	84		2.245	122
2.25	115		2.25	118		2.25	105		2.25	133
2.255	139		2.255	109		2.255	115		2.255	169
2.26	140		2.26	135		2.26	123		2.26	212
2.265	143		2.265	158		2.265	134		2.265	206
2.27	175		2.27	174		2.27	157		2.27	244
2.275	190		2.275	205		2.275	186		2.275	302
2.28	221		2.28	224		2.28	184		2.28	296
2.285	271		2.285	220		2.285	217		2.285	366
2.29	238		2.29	264		2.29	204		2.29	417
2.295	285		2.295	272		2.295	209		2.295	429
2.3	278		2.3	293		2.3	247		2.3	459
2.305	291		2.305	256		2.305	242		2.305	445
2.31	312	S	2.31	296		2.31	207		2.31	430
2.315	295		2.315	267		2.315	240		2.315	406
2.32	292		2.32	285		2.32	239		2.32	417
2.325	288		2.325	243		2.325	219		2.325	399
2.33	257		2.33	219		2.33	228		2.33	380
2.335	253		2.335	251		2.335	201		2.335	364
2.34	217		2.34	240		2.34	194		2.34	361
2.345	209		2.345	184		2.345	164		2.345	254
2.35	173		2.35	176		2.35	167		2.35	264
2.355	180		2.355	163		2.355	151		2.355	204
2.36	135		2.36	130		2.36	118		2.36	196
2.365	136		2.365	105		2.365	96		2.365	160
2.37	102		2.37	120		2.37	110		2.37	157
2.375	105		2.375	108		2.375	68		2.375	132
2.38	68		2.38	83		2.38	79		2.38	100
2.385	72		2.385	76		2.385	60		2.385	103
2.39	75		2.39	78		2.39	76		2.39	77
2.395	77		2.395	73		2.395	54		2.395	61
2.4	66		2.4	69		2.4	53		2.4	70
2.405	55		2.405	71		2.405	45		2.405	50
2.41	48		2.41	68		2.41	51		2.41	73
2.415	55		2.415	48		2.415	58		2.415	51
2.42	54		2.42	61		2.42	39		2.42	66
2.425	59		2.425	57		2.425	56		2.425	66
2.43	63		2.43	62		2.43	57		2.43	64
2.435	60		2.435	66		2.435	50		2.435	65
2.44	57		2.44	54		2.44	47		2.44	61
2.445	56		2.445	57		2.445	56		2.445	57
2.45	63		2.45	39		2.45	63		2.45	63
2.455	66		2.455	61		2.455	56		2.455	64
2.46	62		2.46	56		2.46	49		2.46	56
2.465	87		2.465	50		2.465	45		2.465	66
2.47	71		2.47	70		2.47	55		2.47	69
2.475	53		2.475	68		2.475	48		2.475	68
2.48	58		2.48	66		2.48	64		2.48	68
2.485	77		2.485	76		2.485	59		2.485	68
2.49	53		2.49	66		2.49	67		2.49	64
2.495	59		2.495	52		2.495	46		2.495	61
2.5	57		2.5	63		2.5	55		2.5	48
2.505	69		2.505	45		2.505	56		2.505	68
2.51	42		2.51	59		2.51	52		2.51	63
2.515	61		2.515	52		2.515	61		2.515	63
2.52	69		2.52	62		2.52	52		2.52	58
2.525	50		2.525	56		2.525	49		2.525	68
2.53	59		2.53	61		2.53	53		2.53	59
2.535	63		2.535	77		2.535	58		2.535	57
2.54	48		2.54	74		2.54	66		2.54	67
2.545	54		2.545	70		2.545	72		2.545	63
2.55	65		2.55	73		2.55	48		2.55	68
2.555	63		2.555	91		2.555	75		2.555	71
2.56	78		2.56	90		2.56	61		2.56	74
2.565	86		2.565	99		2.565	56		2.565	86
2.57	85		2.57	136		2.57	82		2.57	97
2.575	103		2.575	142		2.575	87		2.575	97
2.58	105		2.58	148		2.58	90		2.58	116
2.585	131		2.585	174		2.585	99		2.585	113
2.59	159		2.59	191		2.59	114		2.59	127
2.595	164		2.595	205		2.595	109		2.595	154
2.6	146		2.6	219		2.6	139		2.6	138
2.605	169		2.605	232		2.605	107		2.605	156
2.61	190		2.61	228		2.61	134		2.61	166
2.615	186		2.615	252		2.615	151		2.615	137
2.62	179		2.62	262		2.62	158		2.62	187
2.625	192		2.625	283		2.625	168		2.625	160
2.63	187		2.63	266		2.63	157		2.63	161
2.635	202	CL	2.635	283		2.635	158		2.635	166
2.64	193		2.64	247		2.64	145		2.64	144
2.645	182		2.645	218		2.645	149		2.645	140
2.65	169		2.65	240		2.65	148		2.65	141
2.655	156		2.655	234		2.655	124		2.655	142
2.66	146		2.66	185		2.66	109		2.66	120
2.665	135		2.665	151		2.665	112		2.665	122
2.67	109		2.67	134		2.67	115		2.67	115
2.675	101		2.675	146		2.675	97		2.675	107
2.68	87		2.68	125		2.68	82		2.68	91
2.685	73		2.685	107		2.685	54		2.685	79
2.69	75		2.69	100		2.69	65		2.69	65
2.695	71		2.695	80		2.695	60		2.695	79
2.7	58		2.7	75		2.7	50		2.7	69
2.705	65		2.705	75		2.705	37		2.705	51
2.71	66		2.71	57		2.71	61		2.71	42
2.715	48		2.715	46		2.715	51		2.715	56
2.72	52		2.72	37		2.72	44		2.72	42
2.725	57		2.725	48		2.725	52		2.725	65
2.73	41		2.73	63		2.73	41		2.73	46
2.735	56		2.735	46		2.735	41		2.735	38
2.74	42		2.74	64		2.74	36		2.74	49
2.745	56		2.745	58		2.745	48		2.745	40
2.75	58		2.75	43		2.75	34		2.75	49
2.755	47		2.755	55		2.755	23		2.755	51
2.76	58		2.76	57		2.76	39		2.76	52
2.765	55		2.765	56		2.765	45		2.765	40
2.77	41		2.77	55		2.77	36		2.77	52
2.775	57		2.775	48		2.775	43		2.775	48
2.78	52		2.78	49		2.78	52		2.78	35
2.785	66		2.785	76		2.785	55		2.785	48
2.79	47		2.79	61		2.79	38		2.79	53
2.795	46		2.795	71		2.795	46		2.795	57
2.8	64		2.8	70		2.8	47		2.8	59
2.805	61		2.805	59		2.805	43		2.805	68
2.81	68		2.81	54		2.81	44		2.81	60
2.815	62		2.815	44		2.815	35		2.815	52
2.82	62		2.82	58		2.82	40		2.82	47
2.825	55		2.825	52		2.825	44		2.825	50
2.83	44		2.83	63		2.83	37		2.83	50
2.835	57		2.835	60		2.835	39		2.835	39
2.84	50		2.84	61		2.84	48		2.84	68
2.845	55		2.845	51		2.845	47		2.845	43
2.85	48		2.85	72		2.85	47		2.85	36
2.855	53		2.855	55		2.855	50		2.855	47
2.86	42		2.86	60		2.86	44		2.86	48
2.865	45		2.865	52		2.865	37		2.865	39
2.87	62		2.87	53		2.87	42		2.87	47
2.875	40		2.875	46		2.875	48		2.875	37
2.88	46		2.88	45		2.88	40		2.88	40
2.885	54		2.885	58		2.885	41		2.885	42
2.89	44		2.89	42		2.89	36		2.89	63
2.895	46		2.895	35		2.895	32		2.895	36
2.9	51		2.9	43		2.9	43		2.9	38
2.905	44		2.905	41		2.905	43		2.905	48
2.91	40		2.91	52		2.91	39		2.91	41
2.915	47		2.915	32		2.915	24		2.915	48
2.92	53		2.92	40		2.92	28		2.92	47
2.925	42		2.925	43		2.925	34		2.925	37
2.93	33		2.93	33		2.93	43		2.93	35
2.935	49		2.935	45		2.935	42		2.935	34
2.94	35		2.94	35		2.94	39		2.94	48
2.945	49		2.945	53		2.945	36		2.945	40
2.95	37		2.95	39		2.95	44		2.95	32
2.955	43		2.955	46		2.955	33		2.955	38
2.96	35		2.96	47		2.96	31		2.96	35
2.965	41		2.965	41		2.965	37		2.965	44
2.97	41		2.97	39		2.97	34		2.97	36
2.975	37		2.975	44		2.975	38		2.975	39
2.98	52		2.98	30		2.98	35		2.98	39
2.985	38		2.985	37		2.985	37		2.985	47
2.99	44		2.99	33		2.99	29		2.99	20
2.995	47		2.995	48		2.995	24		2.995	34
3	43		3	34		3	30		3	45
3.005	37		3.005	43		3.005	25		3.005	40
3.01	41		3.01	36		3.01	29		3.01	39
3.015	54		3.015	42		3.015	45		3.015	41
3.02	32		3.02	42		3.02	38		3.02	37
3.025	36		3.025	31		3.025	27		3.025	40
3.03	45		3.03	32		3.03	40		3.03	39
3.035	34		3.035	42		3.035	33		3.035	39
3.04	45		3.04	31		3.04	38		3.04	38
3.045	29		3.045	42		3.045	25		3.045	46
3.05	31		3.05	50		3.05	26		3.05	37
3.055	52		3.055	36		3.055	41		3.055	35
3.06	40		3.06	53		3.06	37		3.06	36
3.065	49		3.065	46		3.065	41		3.065	37
3.07	34		3.07	47		3.07	30		3.07	33
3.075	41		3.075	38		3.075	33		3.075	32
3.08	47		3.08	39		3.08	28		3.08	39
3.085	39		3.085	42		3.085	29		3.085	30
3.09	47		3.09	43		3.09	29		3.09	42
3.095	44		3.095	29		3.095	32		3.095	43
3.1	27		3.1	37		3.1	46		3.1	42
3.105	49		3.105	45		3.105	35		3.105	42
3.11	44		3.11	47		3.11	36		3.11	31
3.115	45		3.115	39		3.115	38		3.115	30
3.12	46		3.12	37		3.12	28		3.12	24
3.125	33		3.125	46		3.125	22		3.125	35
3.13	40		3.13	32		3.13	21		3.13	38
3.135	37		3.135	56		3.135	39		3.135	36
3.14	50		3.14	49		3.14	35		3.14	62
3.145	38		3.145	38		3.145	43		3.145	26
3.15	38		3.15	36		3.15	37		3.15	44
3.155	35		3.155	41		3.155	34		3.155	40
3.16	46		3.16	45		3.16	34		3.16	37
3.165	29		3.165	38		3.165	35		3.165	43
3.17	40		3.17	49		3.17	37		3.17	37
3.175	58		3.175	44		3.175	35		3.175	45
3.18	51		3.18	34		3.18	37		3.18	45
3.185	50		3.185	45		3.185	37		3.185	53
3.19	53		3.19	60		3.19	36		3.19	43
3.195	53		3.195	55		3.195	48		3.195	46
3.2	45		3.2	50		3.2	45		3.2	65
3.205	60		3.205	63		3.205	50		3.205	57
3.21	55		3.21	79		3.21	47		3.21	77
3.215	84		3.215	85		3.215	66		3.215	66
3.22	91		3.22	109		3.22	62		3.22	89
3.225	97		3.225	89		3.225	72		3.225	105
3.23	123		3.23	140		3.23	82		3.23	123
3.235	149		3.235	151		3.235	109		3.235	119
3.24	169		3.24	188		3.24	116		3.24	173
3.245	229		3.245	221		3.245	149		3.245	192
3.25	274		3.25	248		3.25	132		3.25	242
3.255	309		3.255	294		3.255	162		3.255	266
3.26	360		3.26	365		3.26	191		3.26	289
3.265	412		3.265	435		3.265	264		3.265	336
3.27	443		3.27	492		3.27	279		3.27	401
3.275	479		3.275	557		3.275	298		3.275	426
3.28	540		3.28	586		3.28	299		3.28	502
3.285	572		3.285	676		3.285	349		3.285	562
3.29	633		3.29	770		3.29	374		3.29	558
3.295	732		3.295	734		3.295	438		3.295	695
3.3	779		3.3	840		3.3	452		3.3	695
3.305	846		3.305	844		3.305	492		3.305	691
3.31	827		3.31	866		3.31	490		3.31	759
3.315	840		3.315	891		3.315	470		3.315	751
3.32	836		3.32	899		3.32	455		3.32	750
3.325	848	K	3.325	930		3.325	513		3.325	745
3.33	823		3.33	914		3.33	467		3.33	718
3.335	772		3.335	866		3.335	452		3.335	710
3.34	756		3.34	789		3.34	445		3.34	638
3.345	716		3.345	716		3.345	420		3.345	653
3.35	646		3.35	730		3.35	389		3.35	587
3.355	574		3.355	625		3.355	323		3.355	522
3.36	505		3.36	527		3.36	292		3.36	450
3.365	412		3.365	494		3.365	279		3.365	402
3.37	390		3.37	423		3.37	246		3.37	339
3.375	367		3.375	372		3.375	221		3.375	299
3.38	269		3.38	305		3.38	177		3.38	253
3.385	247		3.385	289		3.385	159		3.385	222
3.39	240		3.39	218		3.39	136		3.39	161
3.395	163		3.395	163		3.395	121		3.395	149
3.4	150		3.4	170		3.4	88		3.4	119
3.405	113		3.405	140		3.405	86		3.405	105
3.41	95		3.41	106		3.41	65		3.41	92
3.415	76		3.415	93		3.415	64		3.415	62
3.42	79		3.42	95		3.42	47		3.42	64
3.425	69		3.425	68		3.425	45		3.425	80
3.43	51		3.43	60		3.43	50		3.43	63
3.435	50		3.435	40		3.435	49		3.435	41
3.44	56		3.44	49		3.44	32		3.44	43
3.445	50		3.445	41		3.445	38		3.445	39
3.45	40		3.45	44		3.45	33		3.45	40
3.455	42		3.455	48		3.455	46		3.455	30
3.46	50		3.46	49		3.46	45		3.46	38
3.465	44		3.465	48		3.465	31		3.465	39
3.47	49		3.47	32		3.47	23		3.47	40
3.475	37		3.475	43		3.475	25		3.475	41
3.48	50		3.48	35		3.48	28		3.48	48
3.485	38		3.485	35		3.485	37		3.485	45
3.49	33		3.49	38		3.49	37		3.49	38
3.495	50		3.495	40		3.495	32		3.495	44
3.5	47		3.5	47		3.5	43		3.5	46
3.505	48		3.505	52		3.505	27		3.505	53
3.51	57		3.51	45		3.51	51		3.51	52
3.515	49		3.515	53		3.515	41		3.515	54
3.52	56		3.52	64		3.52	58		3.52	58
3.525	71		3.525	73		3.525	35		3.525	54
3.53	63		3.53	54		3.53	47		3.53	69
3.535	79		3.535	73		3.535	47		3.535	81
3.54	61		3.54	71		3.54	51		3.54	70
3.545	94		3.545	66		3.545	60		3.545	60
3.55	79		3.55	92		3.55	66		3.55	78
3.555	100		3.555	93		3.555	67		3.555	107
3.56	101		3.56	118		3.56	60		3.56	91
3.565	105		3.565	106		3.565	59		3.565	102
3.57	133		3.57	113		3.57	78		3.57	95
3.575	129		3.575	122		3.575	84		3.575	101
3.58	139		3.58	140		3.58	76		3.58	125
3.585	113		3.585	128		3.585	95		3.585	105
3.59	139		3.59	135		3.59	78		3.59	124
3.595	142		3.595	132		3.595	71		3.595	107
3.6	120		3.6	155		3.6	81		3.6	131
3.605	128		3.605	124		3.605	83		3.605	103
3.61	137		3.61	132		3.61	81		3.61	131
3.615	121		3.615	115		3.615	87		3.615	104
3.62	129		3.62	120		3.62	78		3.62	105
3.625	132		3.625	134		3.625	80		3.625	87
3.63	126		3.63	111		3.63	77		3.63	96
3.635	131		3.635	109		3.635	67		3.635	88
3.64	122		3.64	124		3.64	62		3.64	79
3.645	120		3.645	100		3.645	72		3.645	70
3.65	97		3.65	108		3.65	64		3.65	93
3.655	114		3.655	110		3.655	65		3.655	61
3.66	119		3.66	77		3.66	58		3.66	74
3.665	107		3.665	94		3.665	67		3.665	49
3.67	123		3.67	76		3.67	58		3.67	65
3.675	116		3.675	107		3.675	47		3.675	59
3.68	138		3.68	82		3.68	59		3.68	53
3.685	139		3.685	84		3.685	57		3.685	36
3.69	127		3.69	80		3.69	41		3.69	50
3.695	117		3.695	77		3.695	43		3.695	41
3.7	110		3.7	82		3.7	45		3.7	48
3.705	127		3.705	73		3.705	40		3.705	46
3.71	117		3.71	66		3.71	44		3.71	38
3.715	113		3.715	84		3.715	47		3.715	47
3.72	108		3.72	68		3.72	53		3.72	31
3.725	92		3.725	67		3.725	57		3.725	39
3.73	98		3.73	62		3.73	44		3.73	39
3.735	87		3.735	51		3.735	43		3.735	39
3.74	76		3.74	63		3.74	32		3.74	41
3.745	70		3.745	39		3.745	34		3.745	33
3.75	68		3.75	61		3.75	37		3.75	38
3.755	80		3.755	49		3.755	40		3.755	24
3.76	55		3.76	39		3.76	26		3.76	46
3.765	54		3.765	35		3.765	36		3.765	31
3.77	35		3.77	42		3.77	34		3.77	34
3.775	52		3.775	41		3.775	32		3.775	36
3.78	46		3.78	36		3.78	22		3.78	44
3.785	42		3.785	25		3.785	37		3.785	32
3.79	44		3.79	46		3.79	29		3.79	28
3.795	28		3.795	44		3.795	22		3.795	32
3.8	33		3.8	40		3.8	21		3.8	23
3.805	31		3.805	30		3.805	29		3.805	26
3.81	40		3.81	21		3.81	22		3.81	31
3.815	33		3.815	23		3.815	34		3.815	18
3.82	26		3.82	38		3.82	32		3.82	27
3.825	32		3.825	22		3.825	23		3.825	24
3.83	39		3.83	27		3.83	20		3.83	36
3.835	27		3.835	21		3.835	34		3.835	18
3.84	28		3.84	32		3.84	30		3.84	28
3.845	25		3.845	27		3.845	25		3.845	27
3.85	30		3.85	29		3.85	22		3.85	27
3.855	39		3.855	37		3.855	29		3.855	19
3.86	34		3.86	28		3.86	24		3.86	32
3.865	26		3.865	22		3.865	17		3.865	27
3.87	34		3.87	23		3.87	22		3.87	32
3.875	22		3.875	38		3.875	22		3.875	24
3.88	19		3.88	23		3.88	31		3.88	37
3.885	36		3.885	30		3.885	29		3.885	26
3.89	30		3.89	43		3.89	34		3.89	22
3.895	24		3.895	24		3.895	31		3.895	33
3.9	24		3.9	32		3.9	27		3.9	27
3.905	25		3.905	32		3.905	22		3.905	25
3.91	33		3.91	31		3.91	28		3.91	13
3.915	26		3.915	30		3.915	26		3.915	28
3.92	27		3.92	27		3.92	29		3.92	26
3.925	33		3.925	32		3.925	26		3.925	23
3.93	29		3.93	30		3.93	32		3.93	35
3.935	29		3.935	24		3.935	16		3.935	23
3.94	32		3.94	33		3.94	28		3.94	26
3.945	26		3.945	36		3.945	33		3.945	22
3.95	27		3.95	30		3.95	18		3.95	32
3.955	33		3.955	25		3.955	23		3.955	25
3.96	36		3.96	34		3.96	22		3.96	28
3.965	34		3.965	31		3.965	29		3.965	23
3.97	27		3.97	38		3.97	15		3.97	28
3.975	28		3.975	33		3.975	24		3.975	34
3.98	35		3.98	32		3.98	33		3.98	28
3.985	34		3.985	30		3.985	22		3.985	27
3.99	40		3.99	26		3.99	22		3.99	24
3.995	20		3.995	23		3.995	31		3.995	19
4	48		4	20		4	33		4	40
4.005	35		4.005	30		4.005	26		4.005	29
4.01	39		4.01	42		4.01	26		4.01	43
4.015	39		4.015	21		4.015	31		4.015	25
4.02	41		4.02	39		4.02	33		4.02	28
4.025	43		4.025	23		4.025	30		4.025	34
4.03	32		4.03	34		4.03	25		4.03	21
4.035	40		4.035	37		4.035	21		4.035	31
4.04	40		4.04	32		4.04	24		4.04	33
4.045	46		4.045	27		4.045	23		4.045	32
4.05	33		4.05	31		4.05	29		4.05	28
4.055	41		4.055	24		4.055	21		4.055	33
4.06	31		4.06	39		4.06	34		4.06	31
4.065	30		4.065	23		4.065	27		4.065	25
4.07	26		4.07	31		4.07	26		4.07	25
4.075	39		4.075	32		4.075	31		4.075	18
4.08	25		4.08	31		4.08	19		4.08	29
4.085	35		4.085	23		4.085	23		4.085	24
4.09	34		4.09	22		4.09	21		4.09	35
4.095	29		4.095	30		4.095	26		4.095	31
4.1	32		4.1	31		4.1	14		4.1	25
4.105	39		4.105	32		4.105	16		4.105	28
4.11	21		4.11	20		4.11	17		4.11	21
4.115	22		4.115	21		4.115	17		4.115	31
4.12	23		4.12	26		4.12	24		4.12	25
4.125	19		4.125	25		4.125	34		4.125	36
4.13	27		4.13	31		4.13	23		4.13	25
4.135	29		4.135	24		4.135	19		4.135	28
4.14	39		4.14	21		4.14	26		4.14	17
4.145	37		4.145	29		4.145	25		4.145	28
4.15	23		4.15	17		4.15	22		4.15	27
4.155	29		4.155	21		4.155	24		4.155	22
4.16	24		4.16	29		4.16	16		4.16	22
4.165	19		4.165	26		4.165	31		4.165	32
4.17	26		4.17	28		4.17	24		4.17	30
4.175	22		4.175	28		4.175	22		4.175	34
4.18	26		4.18	30		4.18	18		4.18	26
4.185	26		4.185	34		4.185	25		4.185	26
4.19	37		4.19	25		4.19	26		4.19	22
4.195	36		4.195	30		4.195	23		4.195	15
4.2	26		4.2	31		4.2	26		4.2	21
4.205	20		4.205	27		4.205	20		4.205	22
4.21	22		4.21	24		4.21	22		4.21	18
4.215	25		4.215	25		4.215	22		4.215	24
4.22	29		4.22	25		4.22	20		4.22	23
4.225	20		4.225	23		4.225	24		4.225	32
4.23	31		4.23	18		4.23	18		4.23	19
4.235	17		4.235	20		4.235	23		4.235	22
4.24	33		4.24	30		4.24	21		4.24	24
4.245	30		4.245	22		4.245	23		4.245	16
4.25	28		4.25	17		4.25	18		4.25	28
4.255	28		4.255	27		4.255	22		4.255	22
4.26	18		4.26	25		4.26	19		4.26	29
4.265	37		4.265	31		4.265	16		4.265	20
4.27	30		4.27	26		4.27	22		4.27	17
4.275	23		4.275	21		4.275	23		4.275	29
4.28	20		4.28	27		4.28	14		4.28	25
4.285	33		4.285	23		4.285	15		4.285	26
4.29	28		4.29	25		4.29	27		4.29	28
4.295	24		4.295	27		4.295	18		4.295	27
4.3	19		4.3	25		4.3	23		4.3	24
4.305	22		4.305	20		4.305	22		4.305	24
4.31	17		4.31	33		4.31	16		4.31	17
4.315	31		4.315	20		4.315	14		4.315	19
4.32	34		4.32	29		4.32	26		4.32	17
4.325	26		4.325	20		4.325	14		4.325	23
4.33	21		4.33	25		4.33	24		4.33	29
4.335	25		4.335	26		4.335	21		4.335	22
4.34	31		4.34	28		4.34	14		4.34	25
4.345	19		4.345	25		4.345	15		4.345	22
4.35	20		4.35	25		4.35	20		4.35	22
4.355	26		4.355	23		4.355	18		4.355	16
4.36	35		4.36	17		4.36	19		4.36	23
4.365	22		4.365	25		4.365	21		4.365	20
4.37	25		4.37	25		4.37	22		4.37	22
4.375	28		4.375	17		4.375	27		4.375	25
4.38	25		4.38	35		4.38	29		4.38	26
4.385	21		4.385	13		4.385	21		4.385	18
4.39	29		4.39	25		4.39	31		4.39	29
4.395	25		4.395	27		4.395	24		4.395	33
4.4	29		4.4	26		4.4	22		4.4	17
4.405	33		4.405	27		4.405	19		4.405	18
4.41	18		4.41	31		4.41	19		4.41	20
4.415	19		4.415	24		4.415	20		4.415	26
4.42	31		4.42	39		4.42	26		4.42	32
4.425	35		4.425	23		4.425	26		4.425	20
4.43	31		4.43	28		4.43	13		4.43	26
4.435	25		4.435	28		4.435	25		4.435	23
4.44	21		4.44	20		4.44	23		4.44	16
4.445	22		4.445	23		4.445	20		4.445	21
4.45	28		4.45	18		4.45	25		4.45	35
4.455	26		4.455	32		4.455	24		4.455	26
4.46	27		4.46	22		4.46	19		4.46	24
4.465	31		4.465	27		4.465	16		4.465	26
4.47	28		4.47	19		4.47	20		4.47	28
4.475	29		4.475	20		4.475	25		4.475	30
4.48	22		4.48	27		4.48	19		4.48	17
4.485	28		4.485	23		4.485	15		4.485	32
4.49	31		4.49	27		4.49	25		4.49	34
4.495	27		4.495	15		4.495	20		4.495	22
4.5	28		4.5	26		4.5	17		4.5	32
4.505	29		4.505	24		4.505	18		4.505	29
4.51	23		4.51	37		4.51	18		4.51	22
4.515	23		4.515	16		4.515	18		4.515	22
4.52	25		4.52	19		4.52	15		4.52	27
4.525	33		4.525	19		4.525	24		4.525	22
4.53	20		4.53	28		4.53	21		4.53	28
4.535	24		4.535	22		4.535	22		4.535	31
4.54	35		4.54	25		4.54	25		4.54	29
4.545	22		4.545	25		4.545	29		4.545	27
4.55	19		4.55	25		4.55	19		4.55	17
4.555	27		4.555	32		4.555	26		4.555	17
4.56	35		4.56	18		4.56	18		4.56	32
4.565	26		4.565	22		4.565	18		4.565	25
4.57	21		4.57	30		4.57	12		4.57	24
4.575	24		4.575	18		4.575	20		4.575	37
4.58	21		4.58	24		4.58	22		4.58	24
4.585	21		4.585	27		4.585	22		4.585	28
4.59	27		4.59	24		4.59	23		4.59	28
4.595	22		4.595	21		4.595	26		4.595	26
4.6	22		4.6	25		4.6	19		4.6	24
4.605	26		4.605	27		4.605	21		4.605	26
4.61	26		4.61	21		4.61	10		4.61	31
4.615	24		4.615	31		4.615	22		4.615	26
4.62	19		4.62	17		4.62	24		4.62	32
4.625	38		4.625	19		4.625	23		4.625	26
4.63	32		4.63	24		4.63	29		4.63	11
4.635	38		4.635	28		4.635	19		4.635	16
4.64	23		4.64	24		4.64	20		4.64	32
4.645	23		4.645	18		4.645	22		4.645	19
4.65	23		4.65	31		4.65	17		4.65	20
4.655	25		4.655	25		4.655	14		4.655	25
4.66	19		4.66	31		4.66	16		4.66	26
4.665	25		4.665	25		4.665	29		4.665	18
4.67	22		4.67	14		4.67	14		4.67	25
4.675	20		4.675	35		4.675	19		4.675	22
4.68	23		4.68	36		4.68	18		4.68	17
4.685	18		4.685	25		4.685	19		4.685	18
4.69	27		4.69	24		4.69	19		4.69	22
4.695	30		4.695	24		4.695	14		4.695	37
4.7	25		4.7	26		4.7	11		4.7	17
4.705	21		4.705	20		4.705	24		4.705	17
4.71	17		4.71	35		4.71	18		4.71	15
4.715	23		4.715	20		4.715	24		4.715	29
4.72	24		4.72	20		4.72	10		4.72	17
4.725	26		4.725	17		4.725	15		4.725	17
4.73	21		4.73	18		4.73	15		4.73	21
4.735	23		4.735	20		4.735	27		4.735	22
4.74	30		4.74	29		4.74	11		4.74	24
4.745	20		4.745	19		4.745	25		4.745	20
4.75	33		4.75	22		4.75	21		4.75	23
4.755	27		4.755	18		4.755	23		4.755	23
4.76	16		4.76	23		4.76	27		4.76	22
4.765	23		4.765	22		4.765	14		4.765	21
4.77	18		4.77	27		4.77	13		4.77	24
4.775	13		4.775	21		4.775	22		4.775	20
4.78	23		4.78	18		4.78	16		4.78	25
4.785	21		4.785	23		4.785	18		4.785	21
4.79	21		4.79	24		4.79	12		4.79	21
4.795	19		4.795	23		4.795	23		4.795	20
4.8	22		4.8	26		4.8	24		4.8	26
4.805	33		4.805	13		4.805	18		4.805	23
4.81	28		4.81	19		4.81	20		4.81	30
4.815	22		4.815	21		4.815	14		4.815	26
4.82	23		4.82	19		4.82	24		4.82	17
4.825	15		4.825	23		4.825	21		4.825	23
4.83	33		4.83	24		4.83	23		4.83	20
4.835	34		4.835	30		4.835	14		4.835	13
4.84	27		4.84	24		4.84	17		4.84	18
4.845	19		4.845	22		4.845	16		4.845	33
4.85	23		4.85	25		4.85	14		4.85	15
4.855	18		4.855	22		4.855	14		4.855	26
4.86	21		4.86	19		4.86	16		4.86	15
4.865	20		4.865	23		4.865	18		4.865	21
4.87	23		4.87	20		4.87	13		4.87	17
4.875	30		4.875	25		4.875	15		4.875	29
4.88	21		4.88	14		4.88	16		4.88	12
4.885	24		4.885	26		4.885	18		4.885	28
4.89	28		4.89	27		4.89	26		4.89	19
4.895	21		4.895	20		4.895	14		4.895	24
4.9	17		4.9	23		4.9	19		4.9	19
4.905	29		4.905	18		4.905	23		4.905	16
4.91	24		4.91	19		4.91	18		4.91	30
4.915	26		4.915	32		4.915	20		4.915	24
4.92	29		4.92	25		4.92	22		4.92	24
4.925	30		4.925	15		4.925	11		4.925	19
4.93	21		4.93	28		4.93	23		4.93	18
4.935	18		4.935	17		4.935	14		4.935	19
4.94	31		4.94	16		4.94	18		4.94	13
4.945	13		4.945	28		4.945	11		4.945	22
4.95	23		4.95	19		4.95	17		4.95	22
4.955	22		4.955	20		4.955	24		4.955	22
4.96	32		4.96	17		4.96	16		4.96	23
4.965	25		4.965	24		4.965	20		4.965	20
4.97	22		4.97	23		4.97	16		4.97	18
4.975	23		4.975	18		4.975	18		4.975	22
4.98	22		4.98	15		4.98	12		4.98	29
4.985	28		4.985	28		4.985	21		4.985	26
4.99	20		4.99	18		4.99	24		4.99	20
4.995	25		4.995	17		4.995	19		4.995	15
5	18		5	26		5	19		5	19
5.005	17		5.005	22		5.005	23		5.005	21
5.01	22		5.01	23		5.01	14		5.01	27
5.015	21		5.015	18		5.015	17		5.015	20
5.02	21		5.02	24		5.02	23		5.02	21
5.025	16		5.025	17		5.025	12		5.025	19
5.03	21		5.03	20		5.03	20		5.03	28
5.035	28		5.035	28		5.035	16		5.035	26
5.04	19		5.04	23		5.04	16		5.04	18
5.045	22		5.045	19		5.045	17		5.045	22
5.05	25		5.05	14		5.05	14		5.05	25
5.055	21		5.055	36		5.055	25		5.055	21
5.06	26		5.06	14		5.06	22		5.06	24
5.065	12		5.065	18		5.065	16		5.065	18
5.07	21		5.07	20		5.07	25		5.07	22
5.075	21		5.075	17		5.075	19		5.075	21
5.08	22		5.08	24		5.08	15		5.08	20
5.085	21		5.085	17		5.085	21		5.085	14
5.09	25		5.09	20		5.09	23		5.09	16
5.095	24		5.095	18		5.095	23		5.095	19
5.1	18		5.1	21		5.1	26		5.1	14
5.105	18		5.105	24		5.105	19		5.105	17
5.11	24		5.11	28		5.11	16		5.11	14
5.115	19		5.115	14		5.115	18		5.115	23
5.12	21		5.12	24		5.12	17		5.12	18
5.125	16		5.125	17		5.125	8		5.125	24
5.13	27		5.13	13		5.13	15		5.13	24
5.135	20		5.135	17		5.135	14		5.135	19
5.14	26		5.14	22		5.14	15		5.14	20
5.145	23		5.145	27		5.145	15		5.145	17
5.15	18		5.15	22		5.15	14		5.15	23
5.155	29		5.155	24		5.155	20		5.155	9
5.16	24		5.16	12		5.16	10		5.16	13
5.165	16		5.165	20		5.165	16		5.165	22
5.17	22		5.17	20		5.17	18		5.17	22
5.175	20		5.175	22		5.175	20		5.175	23
5.18	23		5.18	22		5.18	11		5.18	19
5.185	19		5.185	24		5.185	19		5.185	19
5.19	13		5.19	17		5.19	17		5.19	28
5.195	20		5.195	22		5.195	16		5.195	16
5.2	22		5.2	20		5.2	17		5.2	22
5.205	25		5.205	16		5.205	26		5.205	18
5.21	22		5.21	18		5.21	19		5.21	13
5.215	19		5.215	26		5.215	14		5.215	19
5.22	28		5.22	20		5.22	17		5.22	21
5.225	17		5.225	24		5.225	13		5.225	19
5.23	21		5.23	16		5.23	16		5.23	28
5.235	21		5.235	15		5.235	30		5.235	22
5.24	16		5.24	18		5.24	17		5.24	12
5.245	19		5.245	18		5.245	23		5.245	9
5.25	32		5.25	23		5.25	12		5.25	15
5.255	18		5.255	23		5.255	10		5.255	10
5.26	25		5.26	23		5.26	9		5.26	19
5.265	20		5.265	21		5.265	18		5.265	14
5.27	18		5.27	21		5.27	16		5.27	20
5.275	21		5.275	18		5.275	12		5.275	16
5.28	22		5.28	12		5.28	15		5.28	19
5.285	23		5.285	26		5.285	17		5.285	18
5.29	24		5.29	18		5.29	19		5.29	27
5.295	30		5.295	12		5.295	21		5.295	22
5.3	21		5.3	11		5.3	13		5.3	23
5.305	16		5.305	17		5.305	16		5.305	12
5.31	20		5.31	15		5.31	28		5.31	17
5.315	22		5.315	21		5.315	21		5.315	13
5.32	19		5.32	19		5.32	15		5.32	19
5.325	23		5.325	24		5.325	21		5.325	20
5.33	22		5.33	17		5.33	15		5.33	25
5.335	23		5.335	21		5.335	17		5.335	15
5.34	14		5.34	12		5.34	23		5.34	12
5.345	23		5.345	17		5.345	19		5.345	7
5.35	19		5.35	16		5.35	12		5.35	22
5.355	21		5.355	19		5.355	12		5.355	15
5.36	18		5.36	23		5.36	7		5.36	13
5.365	24		5.365	15		5.365	10		5.365	14
5.37	10		5.37	21		5.37	19		5.37	19
5.375	24		5.375	32		5.375	12		5.375	16
5.38	31		5.38	18		5.38	27		5.38	23
5.385	25		5.385	22		5.385	12		5.385	21
5.39	15		5.39	19		5.39	19		5.39	25
5.395	19		5.395	21		5.395	14		5.395	8
5.4	20		5.4	15		5.4	23		5.4	16
5.405	16		5.405	20		5.405	20		5.405	16
5.41	24		5.41	13		5.41	14		5.41	15
5.415	30		5.415	25		5.415	14		5.415	28
5.42	16		5.42	12		5.42	15		5.42	16
5.425	21		5.425	13		5.425	15		5.425	18
5.43	18		5.43	23		5.43	18		5.43	20
5.435	15		5.435	15		5.435	16		5.435	14
5.44	25		5.44	18		5.44	22		5.44	11
5.445	20		5.445	19		5.445	19		5.445	21
5.45	23		5.45	7		5.45	11		5.45	18
5.455	27		5.455	15		5.455	16		5.455	22
5.46	27		5.46	22		5.46	21		5.46	19
5.465	19		5.465	16		5.465	9		5.465	17
5.47	19		5.47	13		5.47	18		5.47	21
5.475	16		5.475	15		5.475	15		5.475	14
5.48	20		5.48	20		5.48	21		5.48	15
5.485	24		5.485	20		5.485	21		5.485	22
5.49	23		5.49	14		5.49	18		5.49	6
5.495	25		5.495	16		5.495	10		5.495	26
5.5	15		5.5	17		5.5	21		5.5	15
5.505	24		5.505	22		5.505	11		5.505	15
5.51	21		5.51	18		5.51	15		5.51	10
5.515	21		5.515	18		5.515	8		5.515	25
5.52	18		5.52	19		5.52	11		5.52	20
5.525	27		5.525	21		5.525	15		5.525	19
5.53	15		5.53	14		5.53	9		5.53	10
5.535	20		5.535	20		5.535	14		5.535	12
5.54	22		5.54	11		5.54	14		5.54	14
5.545	16		5.545	17		5.545	17		5.545	17
5.55	22		5.55	17		5.55	13		5.55	15
5.555	15		5.555	25		5.555	21		5.555	16
5.56	17		5.56	12		5.56	20		5.56	17
5.565	17		5.565	19		5.565	15		5.565	22
5.57	14		5.57	11		5.57	13		5.57	12
5.575	22		5.575	24		5.575	18		5.575	27
5.58	14		5.58	15		5.58	17		5.58	13
5.585	22		5.585	17		5.585	12		5.585	21
5.59	13		5.59	18		5.59	14		5.59	16
5.595	21		5.595	13		5.595	16		5.595	21
5.6	16		5.6	22		5.6	17		5.6	18
5.605	23		5.605	22		5.605	14		5.605	12
5.61	10		5.61	20		5.61	20		5.61	16
5.615	14		5.615	16		5.615	18		5.615	11
5.62	14		5.62	12		5.62	14		5.62	11
5.625	18		5.625	22		5.625	17		5.625	16
5.63	23		5.63	26		5.63	10		5.63	19
5.635	8		5.635	18		5.635	9		5.635	20
5.64	17		5.64	13		5.64	10		5.64	16
5.645	11		5.645	18		5.645	14		5.645	20
5.65	19		5.65	23		5.65	17		5.65	15
5.655	13		5.655	18		5.655	15		5.655	15
5.66	19		5.66	12		5.66	15		5.66	19
5.665	18		5.665	17		5.665	14		5.665	17
5.67	18		5.67	18		5.67	18		5.67	18
5.675	19		5.675	20		5.675	13		5.675	19
5.68	18		5.68	12		5.68	18		5.68	20
5.685	20		5.685	15		5.685	13		5.685	19
5.69	16		5.69	14		5.69	20		5.69	21
5.695	19		5.695	12		5.695	15		5.695	18
5.7	23		5.7	19		5.7	13		5.7	15
5.705	25		5.705	22		5.705	14		5.705	17
5.71	20		5.71	17		5.71	14		5.71	15
5.715	23		5.715	18		5.715	16		5.715	20
5.72	20		5.72	15		5.72	18		5.72	19
5.725	19		5.725	23		5.725	7		5.725	20
5.73	27		5.73	17		5.73	12		5.73	17
5.735	25		5.735	13		5.735	7		5.735	14
5.74	24		5.74	15		5.74	10		5.74	18
5.745	12		5.745	17		5.745	9		5.745	15
5.75	21		5.75	14		5.75	19		5.75	13
5.755	10		5.755	12		5.755	10		5.755	11
5.76	16		5.76	23		5.76	13		5.76	13
5.765	23		5.765	17		5.765	14		5.765	12
5.77	13		5.77	20		5.77	17		5.77	12
5.775	17		5.775	15		5.775	24		5.775	15
5.78	14		5.78	19		5.78	10		5.78	12
5.785	21		5.785	15		5.785	24		5.785	14
5.79	18		5.79	19		5.79	15		5.79	14
5.795	15		5.795	18		5.795	17		5.795	14
5.8	13		5.8	22		5.8	20		5.8	17
5.805	22		5.805	18		5.805	13		5.805	16
5.81	15		5.81	23		5.81	10		5.81	17
5.815	15		5.815	21		5.815	15		5.815	14
5.82	14		5.82	17		5.82	15		5.82	8
5.825	19		5.825	26		5.825	18		5.825	12
5.83	21		5.83	21		5.83	19		5.83	20
5.835	21		5.835	17		5.835	13		5.835	24
5.84	16		5.84	22		5.84	16		5.84	15
5.845	17		5.845	13		5.845	19		5.845	13
5.85	20		5.85	19		5.85	18		5.85	14
5.855	32		5.855	10		5.855	13		5.855	15
5.86	30		5.86	23		5.86	10		5.86	14
5.865	20		5.865	19		5.865	10		5.865	18
5.87	14		5.87	27		5.87	16		5.87	17
5.875	23		5.875	15		5.875	12		5.875	15
5.88	26		5.88	15		5.88	19		5.88	14
5.885	11		5.885	18		5.885	11		5.885	24
5.89	16		5.89	26		5.89	8		5.89	15
5.895	16		5.895	18		5.895	11		5.895	16
5.9	15		5.9	26		5.9	18		5.9	15
5.905	18		5.905	14		5.905	14		5.905	14
5.91	16		5.91	15		5.91	7		5.91	18
5.915	17		5.915	17		5.915	15		5.915	12
5.92	15		5.92	21		5.92	14		5.92	13
5.925	25		5.925	13		5.925	22		5.925	25
5.93	18		5.93	15		5.93	14		5.93	15
5.935	24		5.935	16		5.935	13		5.935	12
5.94	26		5.94	21		5.94	16		5.94	13
5.945	17		5.945	16		5.945	12		5.945	21
5.95	18		5.95	22		5.95	12		5.95	19
5.955	15		5.955	18		5.955	18		5.955	20
5.96	19		5.96	10		5.96	8		5.96	17
5.965	16		5.965	17		5.965	11		5.965	15
5.97	21		5.97	12		5.97	12		5.97	17
5.975	13		5.975	15		5.975	16		5.975	13
5.98	26		5.98	12		5.98	10		5.98	17
5.985	23		5.985	19		5.985	22		5.985	17
5.99	20		5.99	16		5.99	12		5.99	14
5.995	16		5.995	15		5.995	12		5.995	11
6	22		6	17		6	18		6	13
6.005	17		6.005	12		6.005	14		6.005	13
6.01	15		6.01	14		6.01	13		6.01	14
6.015	13		6.015	22		6.015	16		6.015	26
6.02	22		6.02	13		6.02	13		6.02	15
6.025	16		6.025	16		6.025	13		6.025	18
6.03	15		6.03	18		6.03	13		6.03	19
6.035	18		6.035	15		6.035	22		6.035	22
6.04	20		6.04	18		6.04	13		6.04	17
6.045	11		6.045	11		6.045	14		6.045	11
6.05	11		6.05	15		6.05	13		6.05	15
6.055	25		6.055	14		6.055	15		6.055	21
6.06	21		6.06	16		6.06	13		6.06	11
6.065	14		6.065	15		6.065	8		6.065	14
6.07	15		6.07	15		6.07	10		6.07	18
6.075	17		6.075	25		6.075	17		6.075	16
6.08	14		6.08	17		6.08	13		6.08	12
6.085	8		6.085	18		6.085	14		6.085	15
6.09	13		6.09	14		6.09	17		6.09	16
6.095	25		6.095	18		6.095	18		6.095	14
6.1	23		6.1	21		6.1	14		6.1	15
6.105	14		6.105	20		6.105	11		6.105	18
6.11	18		6.11	15		6.11	9		6.11	14
6.115	10		6.115	17		6.115	12		6.115	11
6.12	19		6.12	12		6.12	10		6.12	16
6.125	15		6.125	16		6.125	13		6.125	17
6.13	15		6.13	18		6.13	15		6.13	22
6.135	19		6.135	21		6.135	9		6.135	18
6.14	16		6.14	28		6.14	13		6.14	9
6.145	19		6.145	9		6.145	11		6.145	18
6.15	14		6.15	15		6.15	11		6.15	21
6.155	18		6.155	14		6.155	14		6.155	17
6.16	13		6.16	15		6.16	12		6.16	15
6.165	13		6.165	26		6.165	16		6.165	12
6.17	19		6.17	15		6.17	11		6.17	19
6.175	13		6.175	15		6.175	8		6.175	17
6.18	12		6.18	14		6.18	17		6.18	10
6.185	20		6.185	22		6.185	12		6.185	16
6.19	11		6.19	14		6.19	16		6.19	17
6.195	15		6.195	13		6.195	10		6.195	15
6.2	17		6.2	16		6.2	9		6.2	21
6.205	13		6.205	16		6.205	8		6.205	13
6.21	14		6.21	14		6.21	10		6.21	17
6.215	15		6.215	10		6.215	11		6.215	15
6.22	13		6.22	9		6.22	10		6.22	14
6.225	12		6.225	7		6.225	10		6.225	13
6.23	15		6.23	9		6.23	13		6.23	18
6.235	19		6.235	12		6.235	12		6.235	12
6.24	14		6.24	19		6.24	8		6.24	17
6.245	15		6.245	12		6.245	14		6.245	7
6.25	15		6.25	9		6.25	13		6.25	14
6.255	13		6.255	18		6.255	11		6.255	21
6.26	15		6.26	14		6.26	13		6.26	17
6.265	14		6.265	17		6.265	9		6.265	14
6.27	15		6.27	14		6.27	10		6.27	17
6.275	17		6.275	12		6.275	10		6.275	13
6.28	29		6.28	23		6.28	9		6.28	19
6.285	19		6.285	18		6.285	12		6.285	22
6.29	18		6.29	13		6.29	9		6.29	19
6.295	22		6.295	12		6.295	13		6.295	14
6.3	11		6.3	25		6.3	20		6.3	12
6.305	23		6.305	12		6.305	14		6.305	18
6.31	20		6.31	17		6.31	12		6.31	18
6.315	24		6.315	18		6.315	10		6.315	17
6.32	15		6.32	7		6.32	14		6.32	12
6.325	36		6.325	16		6.325	13		6.325	11
6.33	25		6.33	16		6.33	16		6.33	12
6.335	29		6.335	18		6.335	15		6.335	14
6.34	20		6.34	19		6.34	9		6.34	13
6.345	36		6.345	12		6.345	10		6.345	20
6.35	28		6.35	15		6.35	9		6.35	13
6.355	32		6.355	16		6.355	21		6.355	11
6.36	34		6.36	11		6.36	16		6.36	17
6.365	34		6.365	16		6.365	13		6.365	22
6.37	27		6.37	17		6.37	12		6.37	19
6.375	46		6.375	16		6.375	14		6.375	15
6.38	31		6.38	13		6.38	13		6.38	14
6.385	42		6.385	16		6.385	10		6.385	16
6.39	36		6.39	16		6.39	15		6.39	18
6.395	29		6.395	18		6.395	12		6.395	18
6.4	38		6.4	17		6.4	15		6.4	12
6.405	38		6.405	22		6.405	18		6.405	18
6.41	34		6.41	19		6.41	17		6.41	28
6.415	36		6.415	9		6.415	12		6.415	20
6.42	43		6.42	16		6.42	13		6.42	13
6.425	32		6.425	14		6.425	9		6.425	5
6.43	33		6.43	27		6.43	14		6.43	11
6.435	36		6.435	14		6.435	9		6.435	16
6.44	45		6.44	18		6.44	17		6.44	20
6.445	35		6.445	13		6.445	15		6.445	26
6.45	33		6.45	7		6.45	15		6.45	20
6.455	30		6.455	16		6.455	13		6.455	14
6.46	24		6.46	18		6.46	11		6.46	13
6.465	21		6.465	14		6.465	16		6.465	18
6.47	23		6.47	16		6.47	14		6.47	21
6.475	23		6.475	22		6.475	12		6.475	20
6.48	26		6.48	16		6.48	23		6.48	16
6.485	22		6.485	21		6.485	12		6.485	9
6.49	18		6.49	20		6.49	14		6.49	12
6.495	25		6.495	13		6.495	11		6.495	19
6.5	13		6.5	17		6.5	17		6.5	12
6.505	19		6.505	20		6.505	11		6.505	15
6.51	17		6.51	20		6.51	13		6.51	19
6.515	20		6.515	13		6.515	9		6.515	10
6.52	19		6.52	15		6.52	12		6.52	12
6.525	17		6.525	10		6.525	18		6.525	16
6.53	9		6.53	12		6.53	10		6.53	13
6.535	17		6.535	16		6.535	12		6.535	12
6.54	12		6.54	19		6.54	9		6.54	14
6.545	17		6.545	23		6.545	7		6.545	8
6.55	13		6.55	14		6.55	11		6.55	17
6.555	15		6.555	12		6.555	9		6.555	21
6.56	16		6.56	14		6.56	8		6.56	17
6.565	19		6.565	16		6.565	12		6.565	17
6.57	12		6.57	17		6.57	12		6.57	13
6.575	11		6.575	20		6.575	9		6.575	13
6.58	12		6.58	12		6.58	10		6.58	12
6.585	15		6.585	11		6.585	7		6.585	19
6.59	11		6.59	19		6.59	19		6.59	12
6.595	29		6.595	15		6.595	12		6.595	12
6.6	12		6.6	15		6.6	5		6.6	8
6.605	20		6.605	12		6.605	14		6.605	17
6.61	13		6.61	18		6.61	10		6.61	14
6.615	14		6.615	10		6.615	5		6.615	9
6.62	14		6.62	16		6.62	12		6.62	15
6.625	15		6.625	13		6.625	9		6.625	12
6.63	12		6.63	14		6.63	16		6.63	13
6.635	19		6.635	17		6.635	11		6.635	15
6.64	17		6.64	17		6.64	12		6.64	10
6.645	10		6.645	10		6.645	20		6.645	8
6.65	19		6.65	17		6.65	9		6.65	10
6.655	11		6.655	13		6.655	11		6.655	11
6.66	19		6.66	16		6.66	11		6.66	14
6.665	16		6.665	13		6.665	6		6.665	12
6.67	15		6.67	11		6.67	6		6.67	22
6.675	11		6.675	15		6.675	9		6.675	16
6.68	14		6.68	10		6.68	10		6.68	15
6.685	8		6.685	15		6.685	15		6.685	13
6.69	14		6.69	14		6.69	12		6.69	14
6.695	23		6.695	16		6.695	3		6.695	10
6.7	11		6.7	16		6.7	19		6.7	11
6.705	14		6.705	23		6.705	8		6.705	15
6.71	11		6.71	10		6.71	9		6.71	11
6.715	16		6.715	23		6.715	13		6.715	21
6.72	17		6.72	14		6.72	17		6.72	11
6.725	10		6.725	12		6.725	8		6.725	7
6.73	12		6.73	13		6.73	15		6.73	16
6.735	19		6.735	6		6.735	12		6.735	18
6.74	11		6.74	19		6.74	13		6.74	14
6.745	12		6.745	11		6.745	9		6.745	9
6.75	10		6.75	10		6.75	9		6.75	25
6.755	14		6.755	13		6.755	7		6.755	8
6.76	18		6.76	16		6.76	9		6.76	8
6.765	9		6.765	16		6.765	8		6.765	10
6.77	20		6.77	15		6.77	10		6.77	11
6.775	8		6.775	14		6.775	8		6.775	16
6.78	15		6.78	10		6.78	9		6.78	14
6.785	21		6.785	11		6.785	5		6.785	8
6.79	15		6.79	10		6.79	9		6.79	12
6.795	11		6.795	8		6.795	12		6.795	23
6.8	18		6.8	11		6.8	7		6.8	19
6.805	12		6.805	10		6.805	8		6.805	12
6.81	11		6.81	13		6.81	14		6.81	10
6.815	18		6.815	19		6.815	9		6.815	19
6.82	11		6.82	16		6.82	9		6.82	10
6.825	12		6.825	12		6.825	8		6.825	12
6.83	13		6.83	13		6.83	5		6.83	11
6.835	14		6.835	19		6.835	16		6.835	11
6.84	15		6.84	8		6.84	13		6.84	17
6.845	13		6.845	9		6.845	11		6.845	14
6.85	13		6.85	10		6.85	11		6.85	16
6.855	12		6.855	10		6.855	10		6.855	13
6.86	14		6.86	10		6.86	7		6.86	8
6.865	19		6.865	11		6.865	9		6.865	11
6.87	13		6.87	17		6.87	12		6.87	10
6.875	20		6.875	8		6.875	7		6.875	10
6.88	20		6.88	10		6.88	9		6.88	17
6.885	10		6.885	16		6.885	7		6.885	18
6.89	16		6.89	8		6.89	12		6.89	8
6.895	11		6.895	16		6.895	14		6.895	13
6.9	15		6.9	12		6.9	9		6.9	14
6.905	14		6.905	9		6.905	12		6.905	12
6.91	9		6.91	11		6.91	9		6.91	14
6.915	7		6.915	10		6.915	11		6.915	15
6.92	10		6.92	8		6.92	10		6.92	15
6.925	14		6.925	28		6.925	7		6.925	13
6.93	6		6.93	13		6.93	10		6.93	11
6.935	10		6.935	12		6.935	10		6.935	15
6.94	8		6.94	11		6.94	10		6.94	15
6.945	15		6.945	13		6.945	9		6.945	19
6.95	12		6.95	6		6.95	14		6.95	14
6.955	18		6.955	12		6.955	10		6.955	10
6.96	13		6.96	14		6.96	10		6.96	12
6.965	15		6.965	13		6.965	11		6.965	9
6.97	22		6.97	13		6.97	16		6.97	11
6.975	14		6.975	13		6.975	10		6.975	14
6.98	10		6.98	8		6.98	8		6.98	10
6.985	17		6.985	14		6.985	19		6.985	9
6.99	18		6.99	14		6.99	14		6.99	11
6.995	15		6.995	11		6.995	7		6.995	11
7	12		7	9		7	9		7	17
7.005	9		7.005	10		7.005	9		7.005	11
7.01	12		7.01	13		7.01	10		7.01	9
7.015	15		7.015	9		7.015	15		7.015	8
7.02	9		7.02	12		7.02	11		7.02	9
7.025	16		7.025	11		7.025	13		7.025	25
7.03	9		7.03	9		7.03	6		7.03	8
7.035	17		7.035	9		7.035	9		7.035	17
7.04	15		7.04	13		7.04	8		7.04	13
7.045	15		7.045	14		7.045	9		7.045	15
7.05	20		7.05	6		7.05	3		7.05	10
7.055	12		7.055	16		7.055	19		7.055	22
7.06	15		7.06	9		7.06	7		7.06	13
7.065	12		7.065	11		7.065	11		7.065	13
7.07	13		7.07	18		7.07	10		7.07	17
7.075	13		7.075	7		7.075	10		7.075	13
7.08	20		7.08	16		7.08	9		7.08	14
7.085	17		7.085	8		7.085	13		7.085	15
7.09	20		7.09	11		7.09	14		7.09	13
7.095	15		7.095	12		7.095	9		7.095	11
7.1	12		7.1	14		7.1	11		7.1	17
7.105	17		7.105	16		7.105	13		7.105	14
7.11	20		7.11	16		7.11	6		7.11	10
7.115	12		7.115	12		7.115	9		7.115	13
7.12	11		7.12	10		7.12	11		7.12	22
7.125	10		7.125	21		7.125	10		7.125	14
7.13	8		7.13	15		7.13	11		7.13	14
7.135	7		7.135	15		7.135	6		7.135	12
7.14	20		7.14	13		7.14	13		7.14	13
7.145	9		7.145	8		7.145	11		7.145	19
7.15	9		7.15	15		7.15	14		7.15	6
7.155	9		7.155	15		7.155	15		7.155	10
7.16	9		7.16	18		7.16	12		7.16	6
7.165	12		7.165	12		7.165	11		7.165	11
7.17	18		7.17	13		7.17	10		7.17	8
7.175	14		7.175	9		7.175	10		7.175	13
7.18	8		7.18	11		7.18	11		7.18	12
7.185	18		7.185	15		7.185	15		7.185	9
7.19	10		7.19	12		7.19	10		7.19	7
7.195	9		7.195	8		7.195	10		7.195	21
7.2	8		7.2	10		7.2	4		7.2	13
7.205	8		7.205	8		7.205	12		7.205	9
7.21	12		7.21	15		7.21	11		7.21	7
7.215	12		7.215	6		7.215	11		7.215	18
7.22	11		7.22	13		7.22	12		7.22	13
7.225	17		7.225	12		7.225	10		7.225	11
7.23	13		7.23	21		7.23	10		7.23	9
7.235	12		7.235	8		7.235	12		7.235	12
7.24	13		7.24	9		7.24	8		7.24	15
7.245	11		7.245	11		7.245	10		7.245	8
7.25	11		7.25	13		7.25	13		7.25	14
7.255	7		7.255	9		7.255	13		7.255	8
7.26	14		7.26	8		7.26	14		7.26	9
7.265	11		7.265	7		7.265	4		7.265	11
7.27	9		7.27	18		7.27	11		7.27	10
7.275	6		7.275	14		7.275	9		7.275	12
7.28	18		7.28	10		7.28	6		7.28	8
7.285	16		7.285	9		7.285	10		7.285	19
7.29	16		7.29	8		7.29	8		7.29	8
7.295	12		7.295	9		7.295	5		7.295	8
7.3	14		7.3	16		7.3	8		7.3	16
7.305	15		7.305	21		7.305	8		7.305	14
7.31	18		7.31	7		7.31	14		7.31	14
7.315	9		7.315	7		7.315	10		7.315	9
7.32	14		7.32	10		7.32	12		7.32	10
7.325	11		7.325	11		7.325	10		7.325	6
7.33	20		7.33	19		7.33	10		7.33	10
7.335	15		7.335	9		7.335	5		7.335	7
7.34	9		7.34	11		7.34	13		7.34	10
7.345	11		7.345	10		7.345	9		7.345	12
7.35	13		7.35	15		7.35	14		7.35	13
7.355	16		7.355	9		7.355	12		7.355	6
7.36	7		7.36	13		7.36	10		7.36	14
7.365	7		7.365	11		7.365	3		7.365	7
7.37	18		7.37	15		7.37	8		7.37	9
7.375	13		7.375	15		7.375	11		7.375	10
7.38	16		7.38	10		7.38	8		7.38	12
7.385	13		7.385	9		7.385	11		7.385	15
7.39	19		7.39	13		7.39	14		7.39	8
7.395	14		7.395	11		7.395	12		7.395	12
7.4	8		7.4	12		7.4	12		7.4	9
7.405	11		7.405	6		7.405	8		7.405	12
7.41	11		7.41	7		7.41	7		7.41	11
7.415	18		7.415	7		7.415	9		7.415	13
7.42	18		7.42	16		7.42	7		7.42	12
7.425	8		7.425	16		7.425	10		7.425	14
7.43	14		7.43	16		7.43	10		7.43	13
7.435	13		7.435	11		7.435	11		7.435	12
7.44	6		7.44	18		7.44	8		7.44	11
7.445	12		7.445	7		7.445	8		7.445	15
7.45	8		7.45	17		7.45	4		7.45	10
7.455	19		7.455	10		7.455	14		7.455	14
7.46	16		7.46	11		7.46	10		7.46	10
7.465	10		7.465	12		7.465	9		7.465	8
7.47	13		7.47	8		7.47	9		7.47	9
7.475	12		7.475	7		7.475	10		7.475	5
7.48	7		7.48	17		7.48	9		7.48	15
7.485	13		7.485	13		7.485	11		7.485	5
7.49	13		7.49	8		7.49	13		7.49	7
7.495	9		7.495	9		7.495	6		7.495	10
7.5	14		7.5	12		7.5	7		7.5	13
7.505	12		7.505	14		7.505	7		7.505	15
7.51	11		7.51	12		7.51	5		7.51	13
7.515	9		7.515	9		7.515	12		7.515	10
7.52	12		7.52	6		7.52	8		7.52	8
7.525	17		7.525	11		7.525	14		7.525	7
7.53	12		7.53	13		7.53	7		7.53	8
7.535	10		7.535	10		7.535	6		7.535	9
7.54	11		7.54	11		7.54	13		7.54	24
7.545	8		7.545	8		7.545	9		7.545	9
7.55	6		7.55	7		7.55	8		7.55	8
7.555	16		7.555	12		7.555	6		7.555	15
7.56	9		7.56	8		7.56	5		7.56	13
7.565	11		7.565	11		7.565	10		7.565	4
7.57	6		7.57	9		7.57	5		7.57	8
7.575	6		7.575	11		7.575	8		7.575	13
7.58	10		7.58	11		7.58	10		7.58	18
7.585	11		7.585	9		7.585	7		7.585	9
7.59	12		7.59	10		7.59	10		7.59	12
7.595	14		7.595	9		7.595	4		7.595	10
7.6	11		7.6	8		7.6	10		7.6	20
7.605	12		7.605	11		7.605	9		7.605	12
7.61	12		7.61	7		7.61	16		7.61	8
7.615	12		7.615	10		7.615	8		7.615	13
7.62	10		7.62	5		7.62	12		7.62	10
7.625	5		7.625	13		7.625	11		7.625	13
7.63	10		7.63	12		7.63	8		7.63	12
7.635	11		7.635	9		7.635	8		7.635	9
7.64	11		7.64	13		7.64	16		7.64	13
7.645	5		7.645	6		7.645	8		7.645	9
7.65	4		7.65	12		7.65	10		7.65	9
7.655	14		7.655	16		7.655	14		7.655	11
7.66	12		7.66	7		7.66	12		7.66	15
7.665	13		7.665	5		7.665	13		7.665	8
7.67	12		7.67	9		7.67	10		7.67	9
7.675	13		7.675	12		7.675	10		7.675	9
7.68	14		7.68	7		7.68	10		7.68	10
7.685	12		7.685	8		7.685	9		7.685	5
7.69	8		7.69	8		7.69	8		7.69	12
7.695	13		7.695	10		7.695	12		7.695	14
7.7	10		7.7	8		7.7	8		7.7	2
7.705	8		7.705	8		7.705	15		7.705	14
7.71	9		7.71	6		7.71	9		7.71	8
7.715	12		7.715	8		7.715	14		7.715	7
7.72	17		7.72	9		7.72	6		7.72	13
7.725	7		7.725	13		7.725	7		7.725	7
7.73	4		7.73	5		7.73	13		7.73	6
7.735	10		7.735	11		7.735	10		7.735	11
7.74	11		7.74	11		7.74	9		7.74	7
7.745	7		7.745	10		7.745	7		7.745	11
7.75	11		7.75	7		7.75	8		7.75	13
7.755	9		7.755	6		7.755	2		7.755	17
7.76	6		7.76	11		7.76	10		7.76	10
7.765	9		7.765	14		7.765	8		7.765	11
7.77	20		7.77	11		7.77	9		7.77	7
7.775	8		7.775	16		7.775	8		7.775	10
7.78	14		7.78	11		7.78	10		7.78	14
7.785	10		7.785	7		7.785	10		7.785	8
7.79	10		7.79	10		7.79	6		7.79	10
7.795	11		7.795	8		7.795	8		7.795	9
7.8	14		7.8	11		7.8	4		7.8	12
7.805	11		7.805	14		7.805	10		7.805	5
7.81	8		7.81	10		7.81	4		7.81	13
7.815	10		7.815	8		7.815	10		7.815	8
7.82	12		7.82	10		7.82	8		7.82	10
7.825	9		7.825	16		7.825	7		7.825	6
7.83	9		7.83	10		7.83	9		7.83	4
7.835	10		7.835	12		7.835	8		7.835	6
7.84	10		7.84	11		7.84	16		7.84	7
7.845	11		7.845	13		7.845	8		7.845	7
7.85	14		7.85	12		7.85	9		7.85	9
7.855	13		7.855	7		7.855	6		7.855	13
7.86	13		7.86	12		7.86	4		7.86	17
7.865	11		7.865	13		7.865	10		7.865	9
7.87	13		7.87	11		7.87	14		7.87	12
7.875	9		7.875	5		7.875	10		7.875	7
7.88	7		7.88	12		7.88	8		7.88	11
7.885	11		7.885	9		7.885	11		7.885	7
7.89	9		7.89	6		7.89	7		7.89	6
7.895	7		7.895	12		7.895	5		7.895	10
7.9	4		7.9	13		7.9	1		7.9	4
7.905	10		7.905	5		7.905	8		7.905	14
7.91	3		7.91	11		7.91	8		7.91	5
7.915	8		7.915	7		7.915	9		7.915	7
7.92	15		7.92	8		7.92	7		7.92	9
7.925	14		7.925	8		7.925	8		7.925	11
7.93	11		7.93	10		7.93	11		7.93	7
7.935	9		7.935	9		7.935	8		7.935	15
7.94	14		7.94	10		7.94	11		7.94	13
7.945	9		7.945	11		7.945	8		7.945	10
7.95	8		7.95	16		7.95	5		7.95	9
7.955	9		7.955	6		7.955	4		7.955	11
7.96	10		7.96	12		7.96	12		7.96	8
7.965	8		7.965	9		7.965	1		7.965	9
7.97	10		7.97	16		7.97	7		7.97	13
7.975	14		7.975	7		7.975	6		7.975	6
7.98	15		7.98	8		7.98	10		7.98	10
7.985	7		7.985	7		7.985	9		7.985	4
7.99	11		7.99	10		7.99	8		7.99	6
7.995	6		7.995	13		7.995	11		7.995	11
8	19		8	7		8	5		8	8
8.005	9		8.005	10		8.005	7		8.005	6
8.01	14		8.01	6		8.01	4		8.01	13
8.015	2		8.015	7		8.015	5		8.015	7
8.02	11		8.02	11		8.02	5		8.02	5
8.025	10		8.025	12		8.025	6		8.025	10
8.03	9		8.03	11		8.03	9		8.03	12
8.035	11		8.035	9		8.035	7		8.035	12
8.04	13		8.04	11		8.04	3		8.04	11
8.045	14		8.045	8		8.045	10		8.045	12
8.05	10		8.05	4		8.05	3		8.05	7
8.055	9		8.055	10		8.055	9		8.055	7
8.06	13		8.06	10		8.06	7		8.06	10
8.065	13		8.065	5		8.065	12		8.065	7
8.07	12		8.07	10		8.07	3		8.07	8
8.075	9		8.075	5		8.075	5		8.075	12
8.08	5		8.08	5		8.08	4		8.08	12
8.085	15		8.085	10		8.085	6		8.085	11
8.09	13		8.09	12		8.09	3		8.09	6
8.095	11		8.095	6		8.095	8		8.095	7
8.1	6		8.1	15		8.1	6		8.1	11
8.105	8		8.105	11		8.105	2		8.105	11
8.11	10		8.11	14		8.11	9		8.11	12
8.115	11		8.115	11		8.115	8		8.115	5
8.12	8		8.12	5		8.12	10		8.12	15
8.125	13		8.125	7		8.125	12		8.125	6
8.13	8		8.13	9		8.13	10		8.13	5
8.135	9		8.135	12		8.135	5		8.135	5
8.14	11		8.14	17		8.14	8		8.14	6
8.145	9		8.145	12		8.145	5		8.145	8
8.15	6		8.15	11		8.15	7		8.15	6
8.155	7		8.155	10		8.155	9		8.155	8
8.16	11		8.16	10		8.16	10		8.16	7
8.165	14		8.165	10		8.165	14		8.165	5
8.17	8		8.17	10		8.17	13		8.17	13
8.175	5		8.175	15		8.175	5		8.175	6
8.18	9		8.18	10		8.18	9		8.18	6
8.185	6		8.185	6		8.185	11		8.185	5
8.19	8		8.19	16		8.19	7		8.19	7
8.195	13		8.195	15		8.195	12		8.195	7
8.2	8		8.2	7		8.2	10		8.2	12
8.205	3		8.205	3		8.205	8		8.205	4
8.21	10		8.21	10		8.21	5		8.21	10
8.215	7		8.215	8		8.215	12		8.215	24
8.22	8		8.22	8		8.22	9		8.22	7
8.225	10		8.225	12		8.225	9		8.225	9
8.23	8		8.23	8		8.23	8		8.23	9
8.235	11		8.235	9		8.235	8		8.235	5
8.24	9		8.24	10		8.24	7		8.24	6
8.245	5		8.245	7		8.245	14		8.245	9
8.25	10		8.25	17		8.25	6		8.25	8
8.255	11		8.255	12		8.255	12		8.255	8
8.26	8		8.26	5		8.26	7		8.26	11
8.265	12		8.265	5		8.265	10		8.265	9
8.27	17		8.27	11		8.27	9		8.27	15
8.275	14		8.275	7		8.275	3		8.275	7
8.28	10		8.28	8		8.28	4		8.28	11
8.285	8		8.285	10		8.285	9		8.285	7
8.29	10		8.29	11		8.29	7		8.29	9
8.295	8		8.295	4		8.295	9		8.295	13
8.3	8		8.3	12		8.3	10		8.3	13
8.305	11		8.305	7		8.305	7		8.305	3
8.31	10		8.31	8		8.31	10		8.31	9
8.315	9		8.315	10		8.315	5		8.315	3
8.32	7		8.32	7		8.32	8		8.32	15
8.325	10		8.325	6		8.325	8		8.325	12
8.33	14		8.33	10		8.33	5		8.33	8
8.335	7		8.335	14		8.335	2		8.335	5
8.34	5		8.34	12		8.34	11		8.34	4
8.345	6		8.345	8		8.345	12		8.345	7
8.35	7		8.35	10		8.35	6		8.35	10
8.355	11		8.355	8		8.355	6		8.355	12
8.36	11		8.36	16		8.36	5		8.36	10
8.365	10		8.365	8		8.365	8		8.365	8
8.37	6		8.37	11		8.37	8		8.37	7
8.375	9		8.375	8		8.375	8		8.375	8
8.38	8		8.38	4		8.38	4		8.38	11
8.385	7		8.385	12		8.385	8		8.385	10
8.39	6		8.39	11		8.39	7		8.39	6
8.395	5		8.395	11		8.395	10		8.395	3
8.4	12		8.4	13		8.4	7		8.4	6
8.405	9		8.405	10		8.405	8		8.405	5
8.41	12		8.41	8		8.41	4		8.41	4
8.415	7		8.415	7		8.415	7		8.415	6
8.42	8		8.42	6		8.42	7		8.42	6
8.425	7		8.425	5		8.425	8		8.425	6
8.43	8		8.43	5		8.43	5		8.43	9
8.435	4		8.435	12		8.435	9		8.435	7
8.44	6		8.44	10		8.44	9		8.44	8
8.445	8		8.445	7		8.445	10		8.445	6
8.45	7		8.45	8		8.45	11		8.45	9
8.455	1		8.455	11		8.455	7		8.455	8
8.46	7		8.46	12		8.46	3		8.46	9
8.465	5		8.465	3		8.465	5		8.465	7
8.47	9		8.47	5		8.47	6		8.47	11
8.475	4		8.475	7		8.475	8		8.475	7
8.48	13		8.48	8		8.48	13		8.48	6
8.485	12		8.485	6		8.485	5		8.485	7
8.49	9		8.49	9		8.49	3		8.49	12
8.495	12		8.495	9		8.495	11		8.495	5
8.5	7		8.5	9		8.5	4		8.5	11
8.505	12		8.505	8		8.505	13		8.505	10
8.51	10		8.51	8		8.51	6		8.51	8
8.515	7		8.515	10		8.515	4		8.515	5
8.52	14		8.52	19		8.52	10		8.52	6
8.525	5		8.525	11		8.525	8		8.525	4
8.53	14		8.53	7		8.53	8		8.53	15
8.535	5		8.535	14		8.535	4		8.535	12
8.54	13		8.54	7		8.54	8		8.54	8
8.545	9		8.545	7		8.545	5		8.545	7
8.55	6		8.55	6		8.55	8		8.55	6
8.555	11		8.555	6		8.555	1		8.555	12
8.56	10		8.56	12		8.56	9		8.56	8
8.565	9		8.565	10		8.565	5		8.565	8
8.57	7		8.57	5		8.57	9		8.57	7
8.575	6		8.575	8		8.575	2		8.575	8
8.58	15		8.58	10		8.58	6		8.58	10
8.585	10		8.585	5		8.585	8		8.585	6
8.59	10		8.59	9		8.59	9		8.59	8
8.595	10		8.595	11		8.595	7		8.595	9
8.6	8		8.6	6		8.6	8		8.6	8
8.605	8		8.605	8		8.605	6		8.605	8
8.61	12		8.61	11		8.61	10		8.61	15
8.615	11		8.615	6		8.615	9		8.615	11
8.62	6		8.62	10		8.62	4		8.62	8
8.625	8		8.625	9		8.625	8		8.625	8
8.63	6		8.63	7		8.63	7		8.63	12
8.635	14		8.635	4		8.635	9		8.635	8
8.64	7		8.64	6		8.64	3		8.64	7
8.645	11		8.645	6		8.645	5		8.645	6
8.65	9		8.65	11		8.65	8		8.65	6
8.655	7		8.655	9		8.655	3		8.655	9
8.66	9		8.66	6		8.66	6		8.66	6
8.665	8		8.665	6		8.665	5		8.665	10
8.67	5		8.67	7		8.67	3		8.67	5
8.675	11		8.675	9		8.675	6		8.675	6
8.68	11		8.68	8		8.68	3		8.68	10
8.685	7		8.685	9		8.685	2		8.685	5
8.69	9		8.69	9		8.69	11		8.69	6
8.695	8		8.695	5		8.695	5		8.695	8
8.7	9		8.7	11		8.7	4		8.7	8
8.705	5		8.705	5		8.705	7		8.705	11
8.71	14		8.71	6		8.71	6		8.71	11
8.715	11		8.715	9		8.715	4		8.715	13
8.72	4		8.72	6		8.72	3		8.72	3
8.725	8		8.725	6		8.725	9		8.725	2
8.73	13		8.73	8		8.73	3		8.73	7
8.735	15		8.735	11		8.735	14		8.735	5
8.74	7		8.74	12		8.74	6		8.74	7
8.745	5		8.745	8		8.745	4		8.745	7
8.75	8		8.75	4		8.75	6		8.75	7
8.755	12		8.755	2		8.755	8		8.755	7
8.76	8		8.76	11		8.76	7		8.76	12
8.765	6		8.765	8		8.765	2		8.765	5
8.77	14		8.77	5		8.77	5		8.77	7
8.775	14		8.775	5		8.775	10		8.775	7
8.78	3		8.78	9		8.78	2		8.78	9
8.785	5		8.785	9		8.785	4		8.785	7
8.79	3		8.79	16		8.79	7		8.79	4
8.795	2		8.795	5		8.795	6		8.795	14
8.8	11		8.8	4		8.8	8		8.8	11
8.805	2		8.805	8		8.805	4		8.805	3
8.81	6		8.81	10		8.81	4		8.81	9
8.815	8		8.815	7		8.815	6		8.815	7
8.82	8		8.82	10		8.82	5		8.82	7
8.825	9		8.825	11		8.825	10		8.825	13
8.83	10		8.83	11		8.83	9		8.83	11
8.835	9		8.835	11		8.835	10		8.835	8
8.84	3		8.84	9		8.84	6		8.84	16
8.845	9		8.845	12		8.845	10		8.845	10
8.85	13		8.85	6		8.85	6		8.85	12
8.855	6		8.855	9		8.855	6		8.855	6
8.86	8		8.86	12		8.86	3		8.86	9
8.865	7		8.865	8		8.865	6		8.865	4
8.87	9		8.87	11		8.87	5		8.87	7
8.875	5		8.875	8		8.875	3		8.875	7
8.88	11		8.88	12		8.88	6		8.88	9
8.885	5		8.885	8		8.885	9		8.885	10
8.89	12		8.89	7		8.89	4		8.89	12
8.895	13		8.895	6		8.895	6		8.895	7
8.9	10		8.9	9		8.9	4		8.9	7
8.905	2		8.905	7		8.905	6		8.905	4
8.91	14		8.91	8		8.91	5		8.91	6
8.915	4		8.915	10		8.915	5		8.915	12
8.92	7		8.92	8		8.92	8		8.92	2
8.925	6		8.925	7		8.925	8		8.925	8
8.93	4		8.93	7		8.93	9		8.93	15
8.935	11		8.935	7		8.935	6		8.935	4
8.94	8		8.94	9		8.94	6		8.94	8
8.945	11		8.945	11		8.945	9		8.945	3
8.95	8		8.95	4		8.95	6		8.95	10
8.955	7		8.955	7		8.955	10		8.955	8
8.96	9		8.96	9		8.96	2		8.96	9
8.965	5		8.965	10		8.965	8		8.965	7
8.97	7		8.97	6		8.97	4		8.97	4
8.975	6		8.975	4		8.975	6		8.975	3
8.98	9		8.98	5		8.98	8		8.98	6
8.985	9		8.985	3		8.985	5		8.985	7
8.99	9		8.99	7		8.99	10		8.99	4
8.995	7		8.995	7		8.995	6		8.995	13
9	9		9	10		9	7		9	12
9.005	4		9.005	8		9.005	5		9.005	8
9.01	5		9.01	4		9.01	6		9.01	8
9.015	6		9.015	6		9.015	9		9.015	6
9.02	5		9.02	9		9.02	5		9.02	3
9.025	9		9.025	10		9.025	4		9.025	9
9.03	8		9.03	6		9.03	10		9.03	7
9.035	9		9.035	11		9.035	5		9.035	5
9.04	11		9.04	10		9.04	2		9.04	7
9.045	6		9.045	5		9.045	7		9.045	7
9.05	6		9.05	12		9.05	10		9.05	3
9.055	3		9.055	7		9.055	8		9.055	5
9.06	12		9.06	5		9.06	8		9.06	7
9.065	10		9.065	9		9.065	9		9.065	2
9.07	5		9.07	8		9.07	6		9.07	5
9.075	3		9.075	8		9.075	9		9.075	6
9.08	9		9.08	6		9.08	2		9.08	10
9.085	8		9.085	4		9.085	4		9.085	9
9.09	11		9.09	7		9.09	7		9.09	10
9.095	8		9.095	6		9.095	7		9.095	8
9.1	6		9.1	3		9.1	6		9.1	3
9.105	3		9.105	10		9.105	5		9.105	6
9.11	9		9.11	3		9.11	5		9.11	7
9.115	7		9.115	6		9.115	5		9.115	8
9.12	8		9.12	10		9.12	8		9.12	7
9.125	6		9.125	12		9.125	5		9.125	2
9.13	7		9.13	6		9.13	6		9.13	7
9.135	5		9.135	8		9.135	5		9.135	6
9.14	8		9.14	8		9.14	5		9.14	9
9.145	8		9.145	6		9.145	6		9.145	6
9.15	7		9.15	11		9.15	5		9.15	9
9.155	13		9.155	12		9.155	6		9.155	1
9.16	4		9.16	4		9.16	3		9.16	5
9.165	16		9.165	4		9.165	8		9.165	6
9.17	9		9.17	2		9.17	7		9.17	11
9.175	10		9.175	5		9.175	7		9.175	11
9.18	8		9.18	6		9.18	8		9.18	3
9.185	11		9.185	6		9.185	1		9.185	10
9.19	9		9.19	14		9.19	6		9.19	5
9.195	9		9.195	8		9.195	6		9.195	9
9.2	9		9.2	10		9.2	8		9.2	8
9.205	5		9.205	6		9.205	8		9.205	9
9.21	8		9.21	4		9.21	3		9.21	9
9.215	7		9.215	8		9.215	3		9.215	4
9.22	5		9.22	11		9.22	8		9.22	7
9.225	12		9.225	5		9.225	6		9.225	10
9.23	8		9.23	5		9.23	4		9.23	7
9.235	6		9.235	8		9.235	7		9.235	11
9.24	7		9.24	5		9.24	4		9.24	7
9.245	4		9.245	7		9.245	5		9.245	5
9.25	9		9.25	8		9.25	3		9.25	11
9.255	7		9.255	9		9.255	9		9.255	3
9.26	11		9.26	11		9.26	3		9.26	7
9.265	8		9.265	7		9.265	4		9.265	6
9.27	0		9.27	6		9.27	7		9.27	8
9.275	8		9.275	6		9.275	5		9.275	13
9.28	7		9.28	6		9.28	9		9.28	8
9.285	8		9.285	9		9.285	3		9.285	5
9.29	6		9.29	9		9.29	6		9.29	6
9.295	9		9.295	7		9.295	7		9.295	11
9.3	8		9.3	12		9.3	3		9.3	7
9.305	10		9.305	12		9.305	6		9.305	8
9.31	8		9.31	14		9.31	11		9.31	9
9.315	5		9.315	7		9.315	8		9.315	8
9.32	8		9.32	3		9.32	3		9.32	7
9.325	12		9.325	9		9.325	5		9.325	7
9.33	12		9.33	7		9.33	12		9.33	10
9.335	11		9.335	9		9.335	11		9.335	18
9.34	12		9.34	7		9.34	6		9.34	7
9.345	10		9.345	10		9.345	3		9.345	10
9.35	12		9.35	7		9.35	15		9.35	16
9.355	9		9.355	14		9.355	9		9.355	7
9.36	6		9.36	14		9.36	9		9.36	10
9.365	19		9.365	9		9.365	7		9.365	12
9.37	8		9.37	9		9.37	7		9.37	11
9.375	10		9.375	11		9.375	9		9.375	7
9.38	8		9.38	10		9.38	6		9.38	7
9.385	11		9.385	6		9.385	10		9.385	6
9.39	8		9.39	5		9.39	8		9.39	8
9.395	10		9.395	6		9.395	6		9.395	9
9.4	10		9.4	17		9.4	5		9.4	8
9.405	9		9.405	12		9.405	9		9.405	15
9.41	9		9.41	13		9.41	12		9.41	11
9.415	8		9.415	11		9.415	12		9.415	10
9.42	12		9.42	14		9.42	12		9.42	9
9.425	13		9.425	11		9.425	10		9.425	8
9.43	13		9.43	14		9.43	10		9.43	8
9.435	9		9.435	12		9.435	12		9.435	7
9.44	9		9.44	11		9.44	6		9.44	11
9.445	15		9.445	9		9.445	12		9.445	12
9.45	9		9.45	9		9.45	4		9.45	9
9.455	13		9.455	11		9.455	8		9.455	14
9.46	13		9.46	17		9.46	9		9.46	15
9.465	7		9.465	6		9.465	11		9.465	10
9.47	13		9.47	15		9.47	10		9.47	8
9.475	12		9.475	15		9.475	10		9.475	12
9.48	9		9.48	7		9.48	12		9.48	9
9.485	10		9.485	10		9.485	6		9.485	16
9.49	8		9.49	16		9.49	7		9.49	14
9.495	11		9.495	7		9.495	10		9.495	8
9.5	9		9.5	9		9.5	10		9.5	4
9.505	12		9.505	7		9.505	6		9.505	9
9.51	7		9.51	9		9.51	7		9.51	11
9.515	8		9.515	7		9.515	4		9.515	6
9.52	11		9.52	8		9.52	5		9.52	4
9.525	9		9.525	8		9.525	11		9.525	3
9.53	5		9.53	6		9.53	7		9.53	14
9.535	8		9.535	9		9.535	10		9.535	9
9.54	9		9.54	7		9.54	4		9.54	9
9.545	7		9.545	5		9.545	3		9.545	10
9.55	7		9.55	8		9.55	13		9.55	5
9.555	4		9.555	7		9.555	7		9.555	10
9.56	7		9.56	3		9.56	1		9.56	12
9.565	11		9.565	9		9.565	7		9.565	9
9.57	7		9.57	5		9.57	7		9.57	7
9.575	7		9.575	6		9.575	6		9.575	6
9.58	5		9.58	10		9.58	4		9.58	8
9.585	8		9.585	10		9.585	6		9.585	4
9.59	6		9.59	8		9.59	5		9.59	6
9.595	6		9.595	10		9.595	6		9.595	1
9.6	4		9.6	8		9.6	6		9.6	5
9.605	5		9.605	4		9.605	3		9.605	2
9.61	3		9.61	9		9.61	5		9.61	6
9.615	3		9.615	5		9.615	5		9.615	5
9.62	6		9.62	10		9.62	6		9.62	4
9.625	6		9.625	5		9.625	6		9.625	9
9.63	8		9.63	4		9.63	8		9.63	4
9.635	5		9.635	10		9.635	8		9.635	7
9.64	4		9.64	9		9.64	9		9.64	5
9.645	2		9.645	7		9.645	6		9.645	4
9.65	7		9.65	10		9.65	6		9.65	4
9.655	8		9.655	4		9.655	6		9.655	4
9.66	8		9.66	3		9.66	1		9.66	12
9.665	6		9.665	7		9.665	2		9.665	4
9.67	9		9.67	9		9.67	3		9.67	5
9.675	6		9.675	5		9.675	6		9.675	8
9.68	7		9.68	3		9.68	7		9.68	4
9.685	3		9.685	4		9.685	4		9.685	7
9.69	6		9.69	3		9.69	7		9.69	7
9.695	5		9.695	5		9.695	6		9.695	8
9.7	6		9.7	5		9.7	7		9.7	4
9.705	7		9.705	9		9.705	4		9.705	11
9.71	10		9.71	4		9.71	7		9.71	10
9.715	6		9.715	6		9.715	2		9.715	4
9.72	7		9.72	8		9.72	2		9.72	2
9.725	7		9.725	5		9.725	7		9.725	11
9.73	5		9.73	8		9.73	5		9.73	7
9.735	5		9.735	7		9.735	3		9.735	5
9.74	7		9.74	5		9.74	11		9.74	6
9.745	8		9.745	6		9.745	1		9.745	7
9.75	5		9.75	4		9.75	6		9.75	8
9.755	10		9.755	4		9.755	3		9.755	6
9.76	8		9.76	8		9.76	7		9.76	11
9.765	7		9.765	1		9.765	8		9.765	6
9.77	4		9.77	9		9.77	6		9.77	5
9.775	10		9.775	3		9.775	4		9.775	4
9.78	4		9.78	8		9.78	6		9.78	7
9.785	8		9.785	9		9.785	6		9.785	8
9.79	7		9.79	4		9.79	4		9.79	8
9.795	7		9.795	7		9.795	5		9.795	7
9.8	8		9.8	1		9.8	5		9.8	5
9.805	7		9.805	6		9.805	4		9.805	4
9.81	11		9.81	6		9.81	7		9.81	2
9.815	5		9.815	4		9.815	3		9.815	7
9.82	6		9.82	9		9.82	3		9.82	5
9.825	2		9.825	9		9.825	4		9.825	4
9.83	5		9.83	7		9.83	4		9.83	8
9.835	6		9.835	9		9.835	3		9.835	6
9.84	10		9.84	5		9.84	2		9.84	10
9.845	5		9.845	6		9.845	7		9.845	5
9.85	9		9.85	6		9.85	5		9.85	12
9.855	7		9.855	15		9.855	2		9.855	4
9.86	4		9.86	4		9.86	7		9.86	2
9.865	10		9.865	9		9.865	9		9.865	7
9.87	5		9.87	9		9.87	5		9.87	4
9.875	4		9.875	2		9.875	5		9.875	9
9.88	1		9.88	7		9.88	8		9.88	8
9.885	5		9.885	8		9.885	10		9.885	2
9.89	16		9.89	8		9.89	2		9.89	12
9.895	8		9.895	5		9.895	9		9.895	5
9.9	4		9.9	11		9.9	4		9.9	4
9.905	11		9.905	5		9.905	4		9.905	6
9.91	5		9.91	7		9.91	8		9.91	2
9.915	2		9.915	4		9.915	6		9.915	3
9.92	7		9.92	6		9.92	4		9.92	6
9.925	5		9.925	10		9.925	3		9.925	9
9.93	5		9.93	6		9.93	3		9.93	5
9.935	7		9.935	5		9.935	7		9.935	5
9.94	7		9.94	4		9.94	5		9.94	5
9.945	5		9.945	4		9.945	4		9.945	7
9.95	4		9.95	5		9.95	6		9.95	5
9.955	5		9.955	2		9.955	6		9.955	3
9.96	12		9.96	3		9.96	2		9.96	8
9.965	5		9.965	6		9.965	7		9.965	5
9.97	2		9.97	4		9.97	6		9.97	6
9.975	9		9.975	5		9.975	2		9.975	8
9.98	6		9.98	4		9.98	6		9.98	5
9.985	3		9.985	6		9.985	10		9.985	4
9.99	6		9.99	12		9.99	6		9.99	5
[truncated: 2 more rows]

## Sheet: Element3
Al	CK			Si			Al			Al+Si
Epedermal layers	0.03	0.01	0.01	0.17	0.1	0.02	1.72	1.76	1.68	1.48	0.96	1.11
Cortical layers	0.03	0.02	0.03	0.23	0	0.05	1.23	1.35	1.2	0.71	0.74	0.75
Stelar layers	0.01	0.01	0	0.08	0.05	0.02	0.71	0.75	0.7	0.15	0.17	0.1
Si
Epedermal layers	0	0.01	0.01	0.12	0.12	0.13	0.03	0.01	0.01	0.12	0.11	0.12
Cortical layers	0.01	0.01	0	0.12	0.11	0.12	0.02	0.01	0.01	0.09	0.1	0.09
Stelar layers	0.01	0	0.01	0.07	0.07	0.06	0.02	0.01	0	0.08	0.07	0.08
Cl
Epedermal layers	0.87	0.79	0.9	1.87	1.74	1.9	3.58	3.55	3.49	1.09	1.07	1.13
Cortical layers	0.79	0.8	0.77	1.46	1.36	1.47	1.74	1.7	1.7	1.21	1.13	1.24
Stelar layers	0.46	0.37	0.48	0.83	0.83	0.87	1.54	1.5	1.55	0.69	0.7	0.47
K
Epedermal layers	10.27	10.96	10.1	12.39	11.2	12.13	6.42	6.44	5.97	8.9	9.12	8.87
Cortical layers	5.6	5.74	5.58	7.47	7.44	7.35	3.13	3.2	3.17	5.54	5.89	5.48
Stelar layers	4.03	4.1	4	6.42	6.41	6.29	2.43	2.38	2.44	3.59	3.6	3.39
Mg
Epedermal layers	0.46	0.52	0.44	0.52	0.53	0.55	0.36	0.37	0.36	0.37	0.33	0.41
Cortical layers	0.28	0.29	0.24	0.35	0.37	0.37	0.25	0.23	0.25	0.28	0.27	0.27
Stelar layers	0.13	0.12	0.11	0.13	0.11	0.14	0.11	0.1	0.1	0.15	0.15	0.14
Zn
Epedermal layers	0.07	0.07	0.08	0.12	0.13	0.12	0.04	0.02	0.04	0.13	0.13	0.14
Cortical layers	0.04	0.04	0.03	0.09	0.09	0.08	0.01	0.02	0.01	0.09	0.1	0.09
Stelar layers	0.02	0.02	0.01	0.02	0.01	0.02	0.01	0.01	0	0.02	0.02	0.01
